# Supplementary material for: Novel multicomponent crystal forms of artesunate
Source: Royal Society of Chemistry journal article supplement (doi:10.1039/d5ce00279f), 2025-01-01
Supplement: d5ce00279f1.pdf [file d5ce00279f1.pdf]

## Supporting Materials

### Novel Multicomponent Crystal Forms of Artesunate

Shadrack J. Madu<sup>1</sup>, Ke Wang<sup>1</sup>, László Fábián<sup>2</sup>, and Mingzhong Li<sup>1\*</sup>

<sup>1</sup>School of Pharmacy, De Montfort University, Leicester LE1 9BH, U.K.

<sup>2</sup>School of Chemistry, Pharmacy and Pharmacology, University of East Anglia, Norwich Research Park, Norwich NR4 7TJ, U.K.

Table S1: List of coformers screened

---

\* Corresponding author: Professor Mingzhong Li, email: mli@dmu.ac.uk

|                                                   |                                                    |                                                     |                                              |
|---------------------------------------------------|----------------------------------------------------|-----------------------------------------------------|----------------------------------------------|
| 1,10-phenanthroline (PHEN, 99% purity)            | Carbamazepine (CBZ, ≥99% purity)                   | Ibuprofen (IBP, ≥99% purity)                        | Paracetamol (PCM, ≥98% purity)               |
| 1,11-undecanedicarboxylic acid (UDCA, 92% purity) | Chrysin (CSN, 99+% purity)                         | Imidazole (IMZ, 99% purity)                         | Phenazine (PHZ, 98% purity)                  |
| 1,2-Di(pyridine-4-yl)ethane (DPE, ≥97% purity)    | Cinchonidine (CNCD, 98.50101% purity)              | Indomethacin (IND, ≥99% purity)                     | Pimelic acid (PIA, 98% purity)               |
| 2,6- dihydro benzoic acid (DHBA, 98% purity)      | Cinnamic acid (Trans) (CNA, ≥99% purity)           | Isonicotinamide (INA, 99% purity)                   | Piperazine (PIZ, 99% purity)                 |
| 2-amino-5-methyl benzoic acid (AMBA, 97% purity)  | Citraconic acid (CTA, 99+% purity)                 | Isonicotinic acid (ISA, 99% purity)                 | Piracetam (PIR, ≥98% purity)                 |
| 2-aminopyrazine (APY, ≥99% purity)                | Citric acid (CA, 99% purity)                       | Isoniazid (INH, 99% purity)                         | Praziquantel (PZQ, ≥98% purity)              |
| 2-Aminopyrimidine (AMP, 98% purity)               | Climbazole (CLBZ, ≥99% purity)                     | Itaconic acid (ITCA, 99% purity)                    | Pthalamide (PTA, ≥97% purity)                |
| 2-Ketoglutaric acid (KEA, 98% purity)             | Clotrimazole (CTZ, ≥97.5% purity)                  | Itraconazole (ITZ, 99% purity)                      | Pyrazinamide (PZA, 99% purity)               |
| 2-Picolinic acid (2-PCA, 99% purity)              | Curcumin (CUR, ≥98% purity)                        | Ketoconazole (KCZ, 98% purity)                      | Pyrazine (PYR, ≥99% purity)                  |
| 3-Aminopyridine (APR, 99% purity)                 | Cyclamic acid (CYA, ≥98% purity)                   | Ketoprofen (KTP, 95% purity)                        | Pyrogallol (PG, ≥98% purity)                 |
| 4,4-Bipyridine (BPY, 98% purity)                  | Cytosine (CYT, ≥98% purity)                        | Lactose BP (LAC)                                    | Quercetin (QUE, ≥95% purity)                 |
| 4-aminobenzoic acid (ABA, ≥99% purity)            | 1,4-Diazabicyclo[2.2.2]octane (DABCO, 97% purity ) | L-arginine (ARG, ≥98% purity)                       | Ranitidine (RAN ≥98% purity)                 |
| 4-hydroxybenzohydrazide (HYB, ≥97% purity)        | Daidzein (DAI, 97% purity)                         | Levetiracetam (LEV, ≥97.5% purity)                  | Resveratrol (Trans) (RSV, 98% purity)        |
| 4-hydroxybenzoic acid (97% purity)                | D-Glucuronic acid (D-GlcA, 98+% purity)            | L-Glutamic (L-GLUA, ≥99% purity)                    | Riboflavin (RIB, 98% purity)                 |
| 5-Fluorouracil (FLU, ≥99% purity)                 | DL-Tryptophan (TRY, ≥99% purity)                   | L-Proline (L-PRO, ≥99% purity)                      | Saccharin (SAC, ≥98% purity)                 |
| 5-Fluorocytosine (5-FC, 99+% purity)              | D-Phenylalanine (PHE, ≥98% purity)                 | L-Tartaric acid (L-TA, 99% purity)                  | Salicylic acid (SA, ≥99% purity)             |
| Acetone 1,3-dicarboxylic acid (ACDA, 97% purity)  | DL-Proline (DL-PRO, 998% purity)                   | Luteolin (LUT, >98% purity)                         | Sebacic acid (SEBA, 98% purity)              |
| Acetophenone oxime (ACO, ≥98% purity)             | Ethylene Diamine Tetra Acetic Acid (EDTA)          | Maleic acid (MAA, ≥99% purity)                      | Suberic acid (SUBA, 99% purity)              |
| Adipic acid (ADA, 99% purity)                     | Etidronic acid (ETA, 96% purity)                   | Malic acid (MA, 98+% purity)                        | Succinic acid (SUA, ≥99% purity)             |
| Albendazole (ABZ, 98% purity)                     | Fluconazole (FLZ, 98% purity)                      | Mebendazole (MBZ, >95% purity)                      | Terephthalic acid (TPA, 98+% purity)         |
| Amodiaquine 2HCL H2O (AQ, ≥97.5% purity)          | Flufenamic acid (FFA, ≥97% purity)                 | Mefenamic acid (MFA, ≥98% purity)                   | Theophylline (THP, 99+% purity)              |
| Allopurinol (ALO, 98% purity)                     | Folic acid (FA, 97% purity)                        | Methenamine (MEA, ≥99% purity)                      | Theophylline-7-acetic acid (TAA, 98% purity) |
| Apigenin (APG, 98% purity)                        | Fumaric Acid (FUMA, ≥99% purity)                   | Muconic acid (MUCA, 98% purity)                     | Tolfenamic acid (TFA, ≥98% purity)           |
| Artemisinin (ART, ≥98% purity)                    | Ganciclovir (GCV, 98% purity)                      | Nadolol (NAD, ≥ 98% purity)                         | Urea (URE, 99.5% purity)                     |
| Aspartame (ASP-TM, 98% purity)                    | Glutaric acid (GLA, 99% purity)                    | Naphthalene-2,6-dicarboxylic acid (NDA, 98% purity) | Voriconazole (VCZ, 98% purity)               |
| Aspirin (ASP, 99% purity)                         | Glycine (GLY, 99% purity)                          | Nicotinamide (NIC, ≥99.5% purity)                   | Xanthine (XAN, 99% purity)                   |
| Azelaic acid (AZA, 96% purity)                    | Hesperetin (HSP, 97% purity)                       | Nicotinic acid (NA, ≥99.5% purity)                  | Xylitol (XLT, ≥ 99% purity)                  |
| Benzoic acid (BZA, 99.6% purity)                  | Hippuric acid (HIA, 98% purity)                    | Niflumic acid (NFA, ≥98% purity)                    |                                              |
| Biotin (BTN, 98% purity)                          | Hydrochlorothiazide (HCT, 95% purity)              | Oxalic acid (OA, 99% purity)                        |                                              |
| Caffeine (CAF, ≥99% purity)                       | Hydroxyurea (HU, 98% purity)                       | Pamoic acid (PMA, 99% purity)                       |                                              |

Table S2: ATS recrystallisation experiments

| Solvent         | Quantity of sample (mg) | Volume of solvent (mL) | Temperature (°C) | Stirring speed (rpm) |
|-----------------|-------------------------|------------------------|------------------|----------------------|
| Methanol        | 100                     | 2                      | 25               | 200                  |
| Ethanol         | 100                     | 2                      | 25               | 200                  |
| Ethyl acetate   | 100                     | 2                      | 25               | 200                  |
| Acetonitrile    | 100                     | 2                      | 25               | 200                  |
| Acetone         | 100                     | 2                      | 25               | 200                  |
| Propan-2-ol     | 100                     | 2                      | 25               | 200                  |
| Chloroform      | 100                     | 4                      | 50               | 200                  |
| Tetrahydrofuran | 100                     | 4                      | 50               | 200                  |
| Dichloromethane | 100                     | 10                     | 70               | 200                  |
| Toluene         | 100                     | 10                     | 100              | 200                  |
| Isobutanol      | 100                     | 2                      | 70               | 200                  |
| Diethyl ether   | 100                     | 20                     | 30               | 700                  |
| Nitromethane    | 100                     | 2                      | 70               | 200                  |
| n-Hexane        | Insoluble               |                        |                  |                      |
| n-Heptane       | Insoluble               |                        |                  |                      |

Table S3: Crystallographic Data for Refinement of ATS Cocrystals/Salts

| Identification code             | ATS-ABA                                                           | ATS <sup>2</sup> -DABCO Form 1                                      | ATS <sup>2</sup> -DABCO Form 2                                     | ATS-PHEN                                                            | ATS-URE-CH <sub>3</sub> OH                                        | ATS-URE-C <sub>2</sub> H <sub>5</sub> N                           |
|---------------------------------|-------------------------------------------------------------------|---------------------------------------------------------------------|--------------------------------------------------------------------|---------------------------------------------------------------------|-------------------------------------------------------------------|-------------------------------------------------------------------|
| Empirical formula               | C <sub>26</sub> H <sub>35</sub> N O <sub>10</sub>                 | C <sub>44</sub> H <sub>68</sub> N <sub>2</sub> O <sub>16</sub>      | C <sub>44</sub> H <sub>68</sub> N <sub>2</sub> O <sub>16</sub>     | C <sub>31</sub> H <sub>36</sub> N <sub>2</sub> O <sub>8</sub>       | C <sub>21</sub> H <sub>36</sub> N <sub>2</sub> O <sub>10</sub>    | C <sub>22</sub> H <sub>35</sub> N <sub>3</sub> O <sub>9</sub>     |
| Formula weight                  | 521.55                                                            | 881.00                                                              | 881.00                                                             | 564.62                                                              | 476.52                                                            | 485.53                                                            |
| Temperature                     | 100.00 K                                                          | 99.99(10) K                                                         | 100.00(10) K                                                       | 99.98(11) K                                                         | 100.00(10) K                                                      | 100 K                                                             |
| Wavelength                      | 1.54184 Å                                                         | 1.54184 Å                                                           | 1.54184 Å                                                          | 1.54184 Å                                                           | 1.54184 Å                                                         | 1.54184 Å                                                         |
| Crystal system                  | Monoclinic                                                        | Monoclinic                                                          | Monoclinic                                                         | Monoclinic                                                          | Monoclinic                                                        | Monoclinic                                                        |
| Space group                     | <i>P</i> 2 <sub>1</sub>                                           | <i>P</i> 2 <sub>1</sub>                                             | <i>P</i> 2 <sub>1</sub>                                            | <i>P</i> 2 <sub>1</sub>                                             | <i>P</i> 2 <sub>1</sub>                                           | <i>P</i> 2 <sub>1</sub>                                           |
| a                               | 5.69290(1) Å                                                      | 10.3355(2) Å                                                        | 11.0046(11) Å                                                      | 9.57054(18) Å                                                       | 10.3625(5) Å                                                      | 10.5562(3) Å                                                      |
| b                               | 17.0162(2) Å                                                      | 10.1548(2) Å                                                        | 8.5912(8) Å                                                        | 51.5305(6) Å                                                        | 7.3357(3) Å                                                       | 7.3837(2) Å                                                       |
| c                               | 13.4451(2) Å                                                      | 21.6741(3) Å                                                        | 23.6155(18) Å                                                      | 9.8305(2) Å                                                         | 15.0315(6) Å                                                      | 15.7892(5) Å                                                      |
| β                               | 96.1350(1)°                                                       | 102.644(2)°                                                         | 98.743(9)°                                                         | 118.766(3)°                                                         | 93.125(4)°                                                        | 98.315(3)°                                                        |
| Volume                          | 1294.99(3) Å <sup>3</sup>                                         | 2219.64(7) Å <sup>3</sup>                                           | 2206.7(3) Å <sup>3</sup>                                           | 4249.88(16) Å <sup>3</sup>                                          | 1140.94(9) Å <sup>3</sup>                                         | 1217.73 (6) Å <sup>3</sup>                                        |
| Z                               | 2                                                                 | 2                                                                   | 2                                                                  | 6                                                                   | 2                                                                 | 2                                                                 |
| Density (calculated)            | 1.338 g/cm <sup>3</sup>                                           | 1.318 g/cm <sup>3</sup>                                             | 1.326 g/cm <sup>3</sup>                                            | 1.324 g/cm <sup>3</sup>                                             | 1.387 g/cm <sup>3</sup>                                           | 1.324 g/cm <sup>3</sup>                                           |
| Absorption coefficient          | 0.861 mm <sup>-1</sup>                                            | 0.830 mm <sup>-1</sup>                                              | 0.835 mm <sup>-1</sup>                                             | 0.789 mm <sup>-1</sup>                                              | 0.929 mm <sup>-1</sup>                                            | 0.863 mm <sup>-1</sup>                                            |
| F(000)                          | 556                                                               | 948                                                                 | 948                                                                | 1800                                                                | 512                                                               | 520                                                               |
| Crystal size                    | 0.30 x 0.20 x 0.05 mm <sup>3</sup>                                | 0.26 x 0.06 x 0.02 mm <sup>3</sup>                                  | 0.15 x 0.12 x 0.03 mm <sup>3</sup>                                 | 0.27 x 0.16 x 0.12 mm <sup>3</sup>                                  | 0.28 x 0.24 x 0.17 mm <sup>3</sup>                                | 0.31 x 0.16 x 0.14 mm <sup>3</sup>                                |
| Theta range for data collection | 3.306 to 77.419°                                                  | 4.181 to 77.338°                                                    | 3.788 to 67.055°                                                   | 3.431 to 77.294°                                                    | 2.944 to 76.682°                                                  | 2.828 to 77.433°                                                  |
| Index ranges                    | -6<= <i>h</i> <=6,<br>-20<= <i>k</i> <=21,<br>-16<= <i>l</i> <=16 | -13<= <i>h</i> <=12,<br>-12<= <i>k</i> <=12,<br>-27<= <i>l</i> <=24 | -13<= <i>h</i> <=13,<br>-10<= <i>k</i> <=4,<br>-27<= <i>l</i> <=28 | -11<= <i>h</i> <=11,<br>-64<= <i>k</i> <=44,<br>-12<= <i>l</i> <=10 | -12<= <i>h</i> <=13,<br>-9<= <i>k</i> <=7,<br>-13<= <i>l</i> <=18 | -12<= <i>h</i> <=13,<br>-8<= <i>k</i> <=9,<br>-19<= <i>l</i> <=17 |
| Reflections collected           | 14940                                                             | 31749                                                               | 15522                                                              | 23260                                                               | 7091                                                              | 7863                                                              |
| Independent reflections         | 5007                                                              | 8877                                                                | 5760                                                               | 10786                                                               | 3560                                                              | 7863                                                              |



|                                   | [R(int) = 0.0361]                  | [R(int) = 0.0488]                  | [R(int) = 0.0738]                | [R(int) = 0.0384]                | [R(int) = 0.0384]                | [R(int) = 0.0708]                  |
|-----------------------------------|------------------------------------|------------------------------------|----------------------------------|----------------------------------|----------------------------------|------------------------------------|
| Completeness to theta = 67.684°   | 100.0 %                            | 100.0 %                            | 99.4 %                           | 95.3 %                           | 97.9 %                           | 98.4 %                             |
| Absorption correction             | Semi-empirical from equivalents    | Gaussian                           | Semi-empirical from equivalents  | Gaussian                         | Semi-empirical from equivalents  | Semi-empirical from equivalents    |
| Max. / min. transmission          | 1.00000 / 0.85477                  | 1.000 / 0.632                      | 1.00000 / 0.52137                | 1.000 / 0.462                    | 1.00000 / 0.60966                | 1.00000 / 0.78661                  |
| Data / restraints / parameters    | 5007 / 243 / 424                   | 8877 / 1 / 567                     | 5760 / 1 / 566                   | 10786 / 1 / 1120                 | 3560 / 1 / 304                   | 7863 / 1 / 313                     |
| Goodness-of-fit on F <sup>2</sup> | 1.033                              | 1.072                              | 1.074                            | 1.052                            | 1.056                            | 1.100                              |
| Final R indices [ >2sigma(I)]     | R1 = 0.0339,<br>wR2 = 0.0836       | R1 = 0.0392,<br>wR2 = 0.0990       | R1 = 0.0800,<br>wR2 = 0.2265     | R1 = 0.0461,<br>wR2 = 0.1203     | R1 = 0.0466,<br>wR2 = 0.1239     | R1 = 0.0659,<br>wR2 = 0.1891       |
| R indices (all data)              | R1 = 0.0352,<br>wR2 = 0.0847       | R1 = 0.0428,<br>wR2 = 0.1012       | R1 = 0.1015,<br>wR2 = 0.2489     | R1 = 0.0480,<br>wR2 = 0.1220     | R1 = 0.0487,<br>wR2 = 0.1258     | R1 = 0.0726,<br>wR2 = 0.1972       |
| Flack parameter                   | 0.09(8)                            | -0.12(7)                           | -0.2(3)                          | 0.00(12)                         | -0.13(17)                        | 0.2(3)                             |
| Largest diff. peak / hole         | 0.179 and -0.171 e.Å <sup>-3</sup> | 0.210 and -0.236 e.Å <sup>-3</sup> | 0.662 / -0.418 e.Å <sup>-3</sup> | 0.413 / -0.287 e.Å <sup>-3</sup> | 0.314 / -0.276 e.Å <sup>-3</sup> | 0.252 and -0.291 e.Å <sup>-3</sup> |

Table S4: PXRD patterns of experimental screening

| S/N | Coformer                  | PXRD Pattern                                                                                                                                                                                                                                                                                |
|-----|---------------------------|---------------------------------------------------------------------------------------------------------------------------------------------------------------------------------------------------------------------------------------------------------------------------------------------|
| 1   | Amodiaquine 2HCL H2O (AQ) | <p>ATS-AQ 1:1 SDG (MeOH)</p> <p>Raw Dihydroartemisinin</p> <p>Raw Amodiaquine HCl</p> <p>Raw Artesunate</p> <p>2-Theta (°)</p>                                                                                                                                                              |
| 2   | Pyrogallol (PG)           | <p>ATS-PG 1:1 SE (DEE)</p> <p>Raw Dihydroartemisinin</p> <p>Raw Pyrogallol</p> <p>Raw Artesunate</p> <p>2-Theta (°)</p>                                                                                                                                                                     |
| 3   | 5-Fluorocytosine (5-FC)   | <p>ATS-5FC 1:1 SE (EtOH)</p> <p>ATS-5FC 1:1 SE (MeOH)</p> <p>ATS-5FC 1:1 SDG (MeOH)</p> <p>Raw Dihydroartemisinin</p> <p>Raw 5-Fluorocytosine</p> <p>Raw Artesunate</p> <p>2-Theta (°)</p>                                                                                                  |
| 4   | Ketoconazole (KCZ)        | <p>ATS-KCZ 1:1 SDG (MeOH)</p> <p>Raw Dihydroartemisinin</p> <p>Raw Ketoconazole</p> <p>Raw Artesunate</p> <p>2-Theta (°)</p>                                                                                                                                                                |
| 5   | Urea (URE)                | <p>ATS-URE 1:1 SDG (IPA)</p> <p>ATS-URE C<sub>2</sub>H<sub>5</sub>O 1:1:1 SDG (EtOH)</p> <p>ATS-URE C<sub>2</sub>H<sub>5</sub>N 1:1:1 SDG (ACN)</p> <p>ATS-URE CH<sub>3</sub>OH 1:1:1 SDG (MeOH)</p> <p>Raw Dihydroartemisinin</p> <p>Raw Urea</p> <p>Raw Artesunate</p> <p>2-Theta (°)</p> |

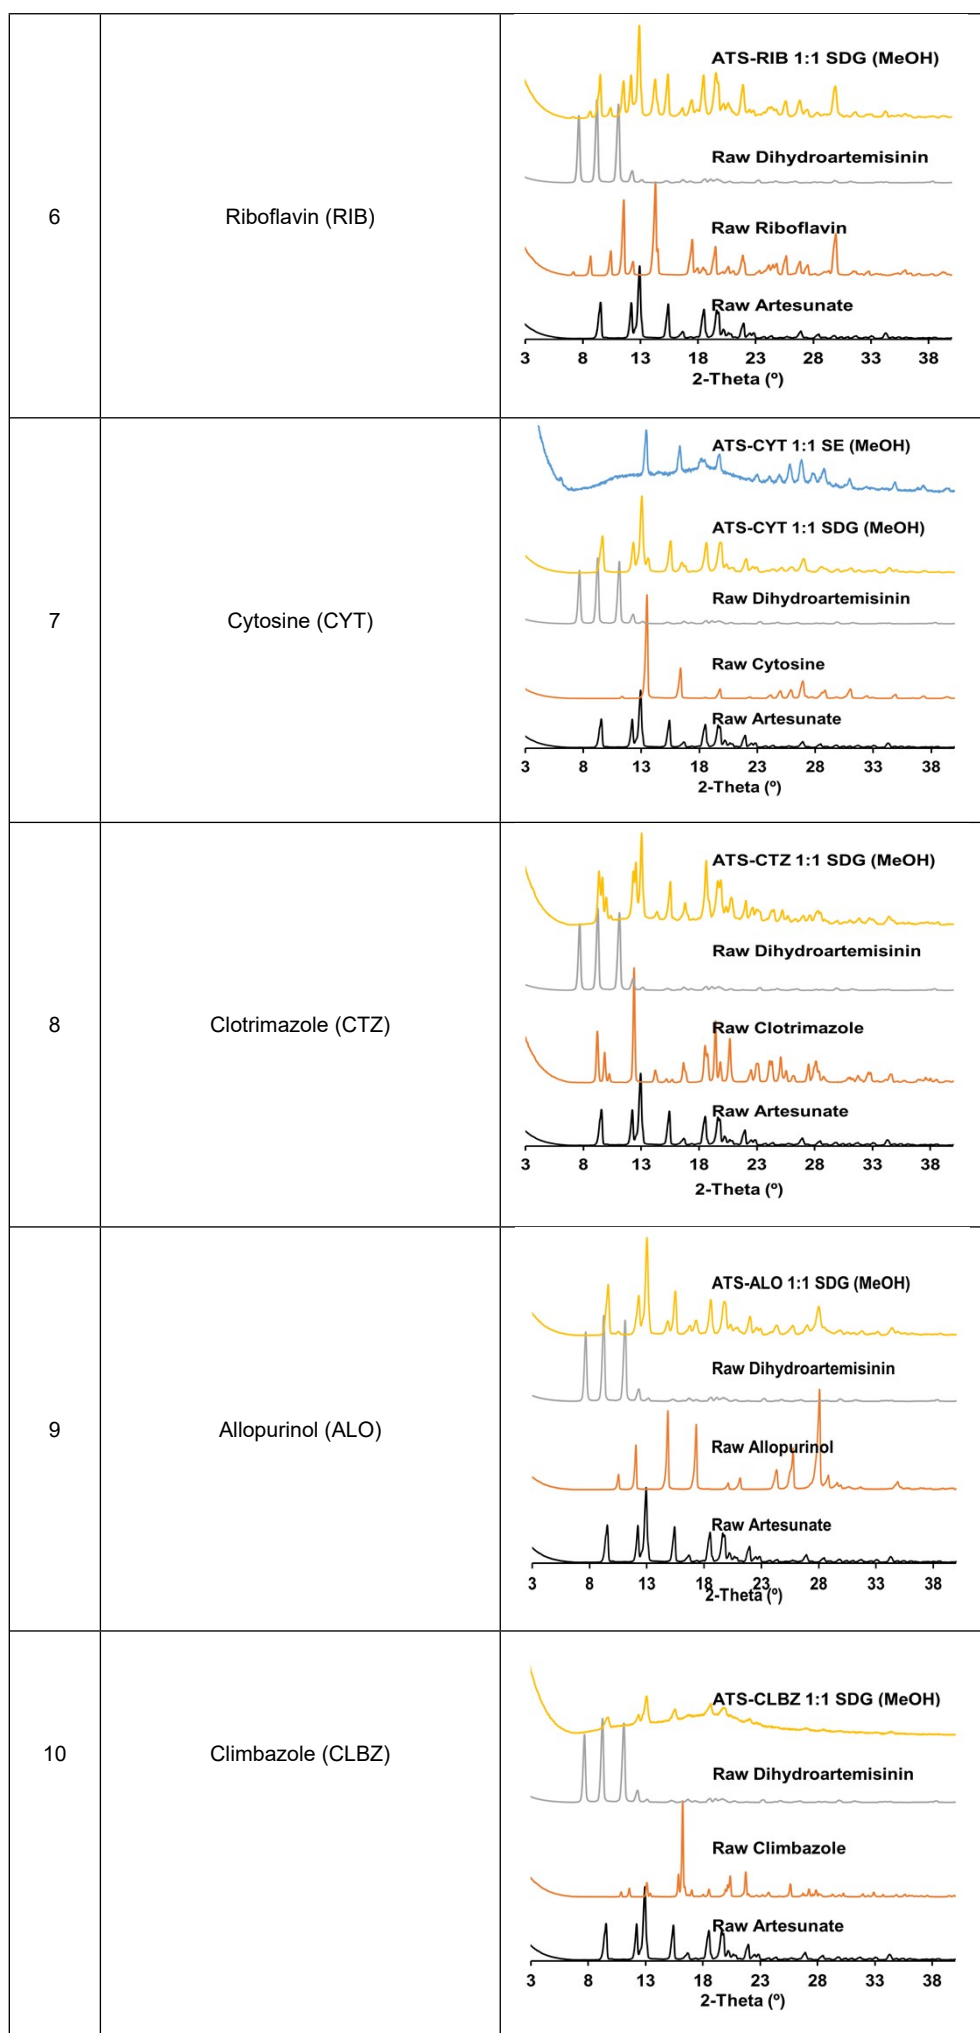

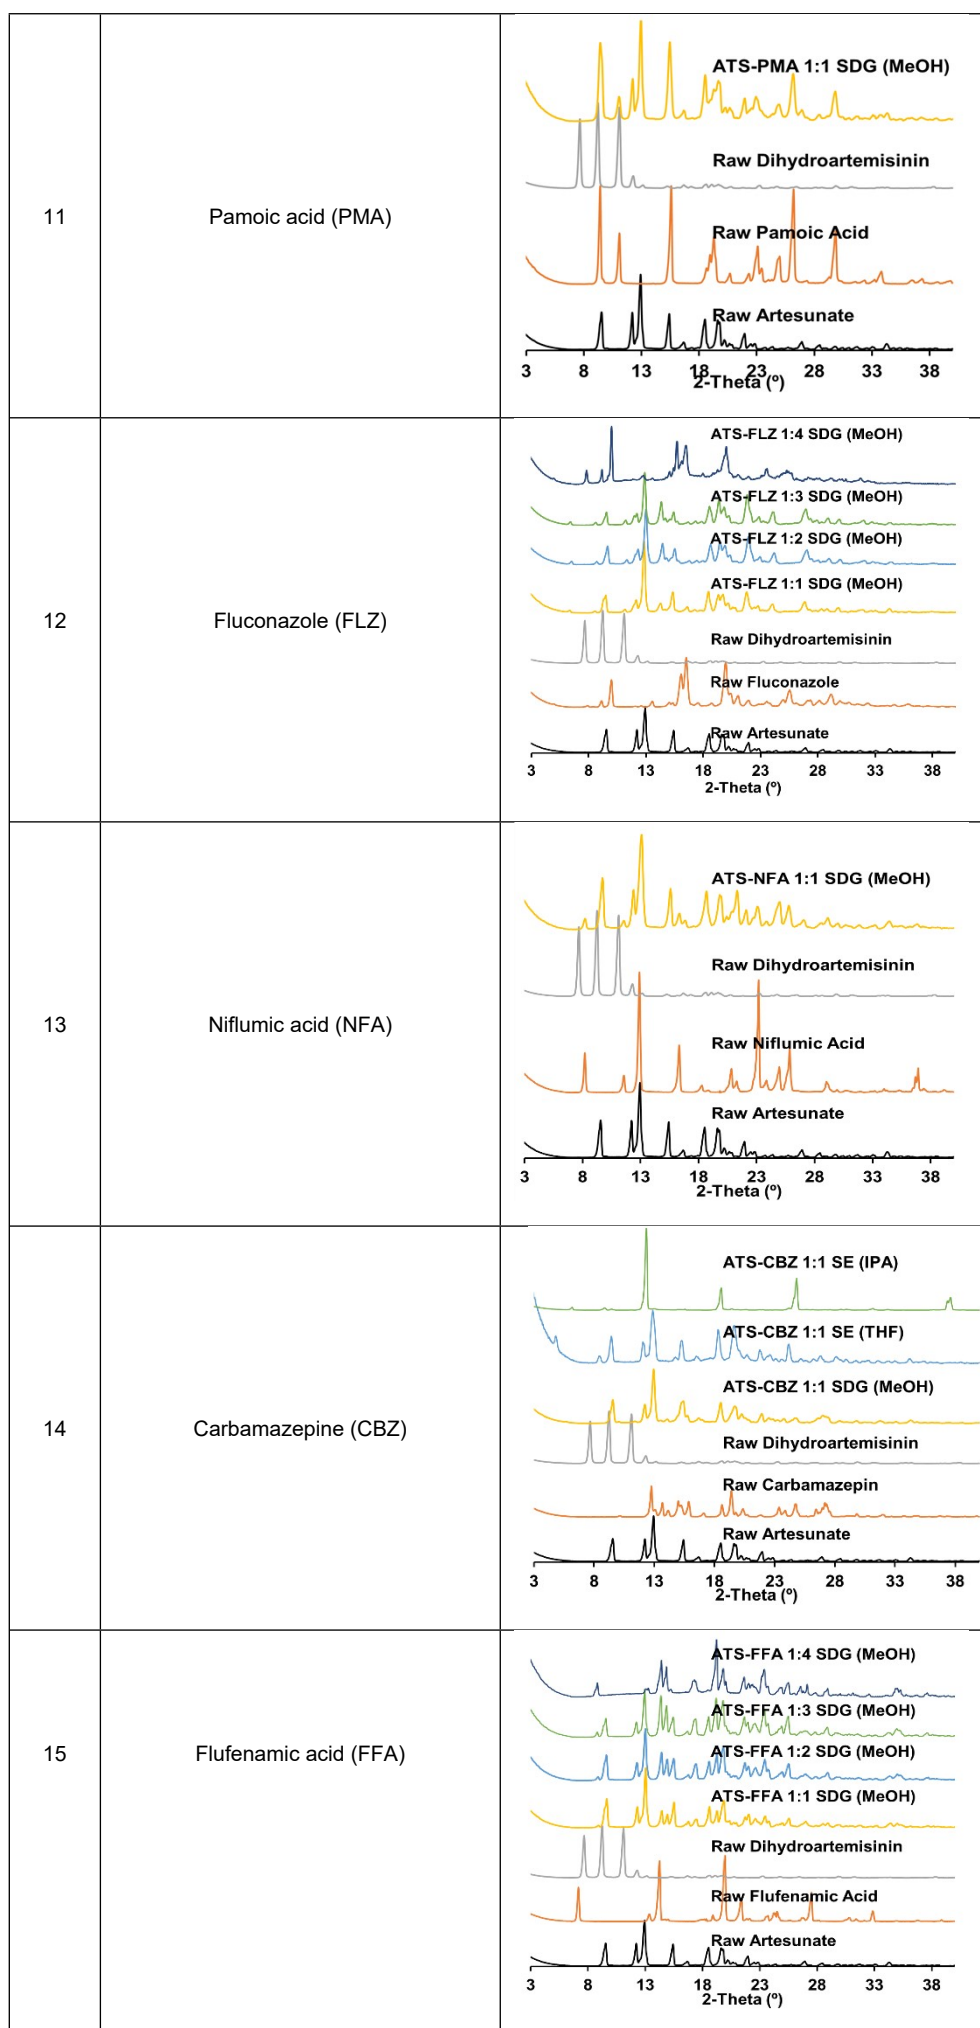

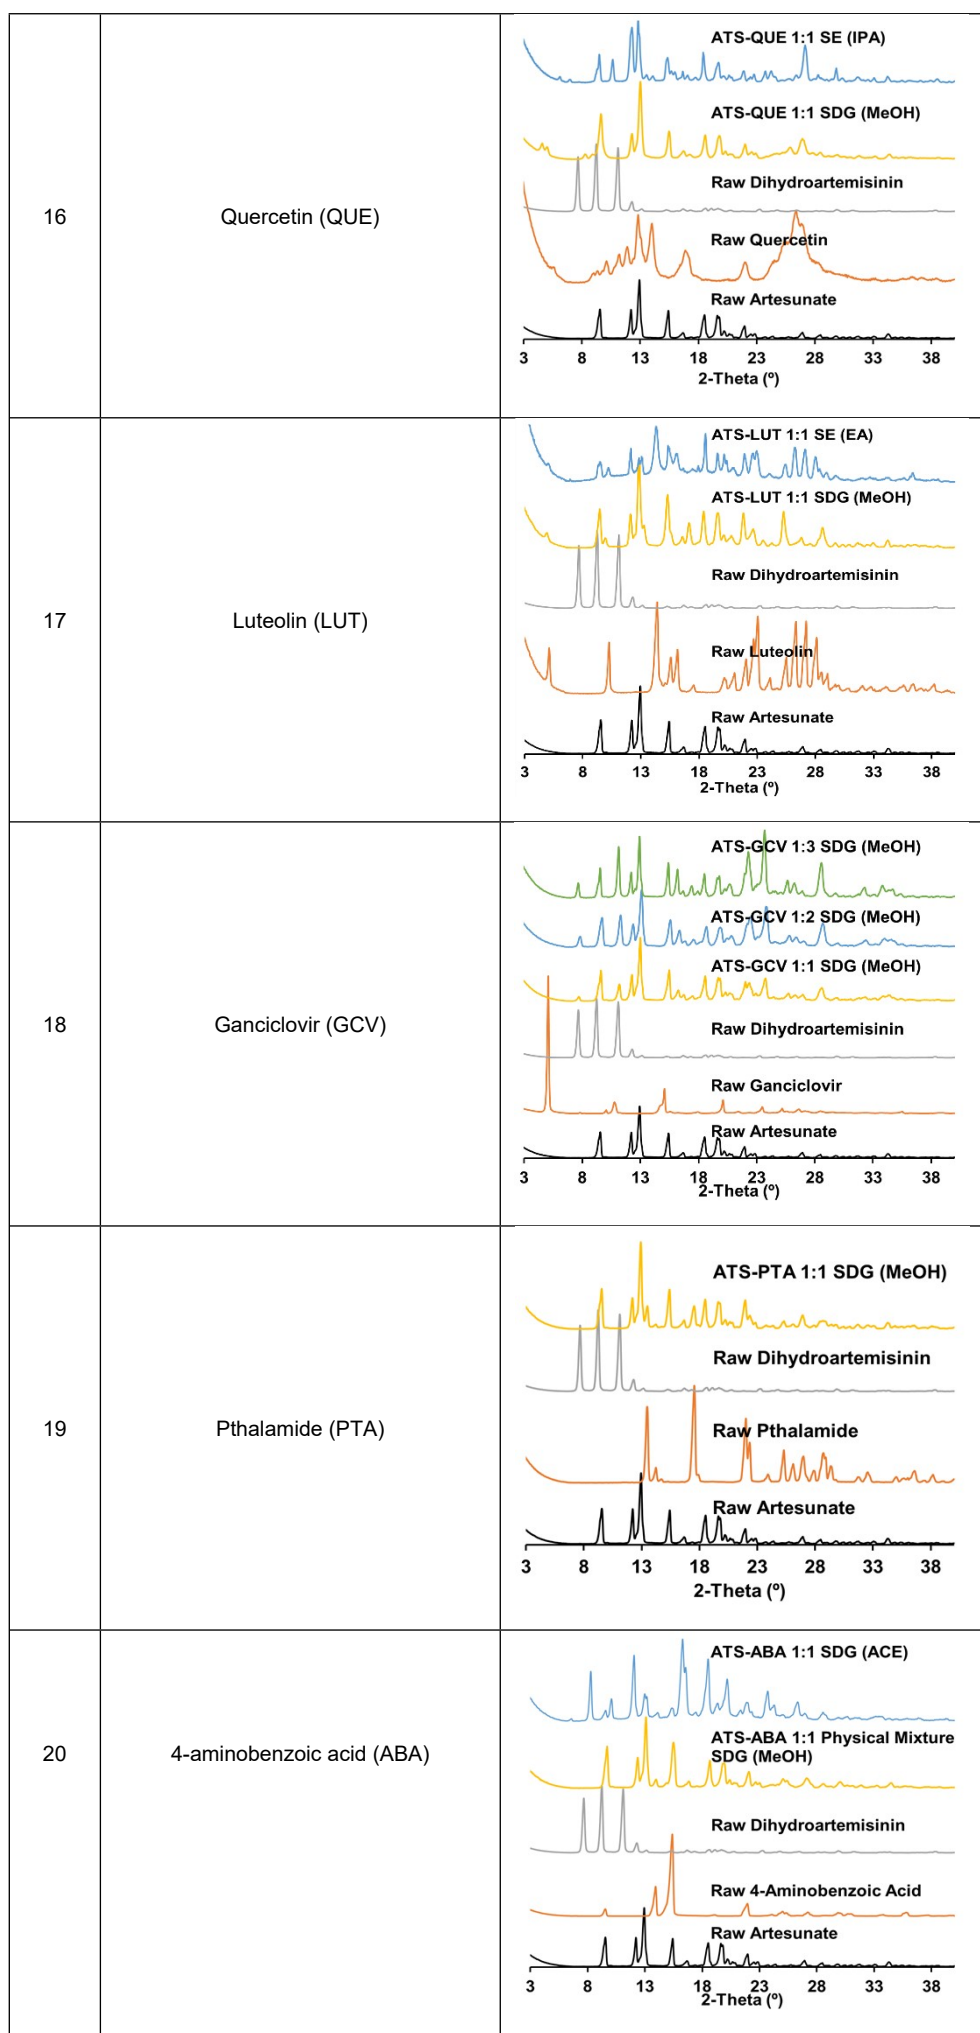

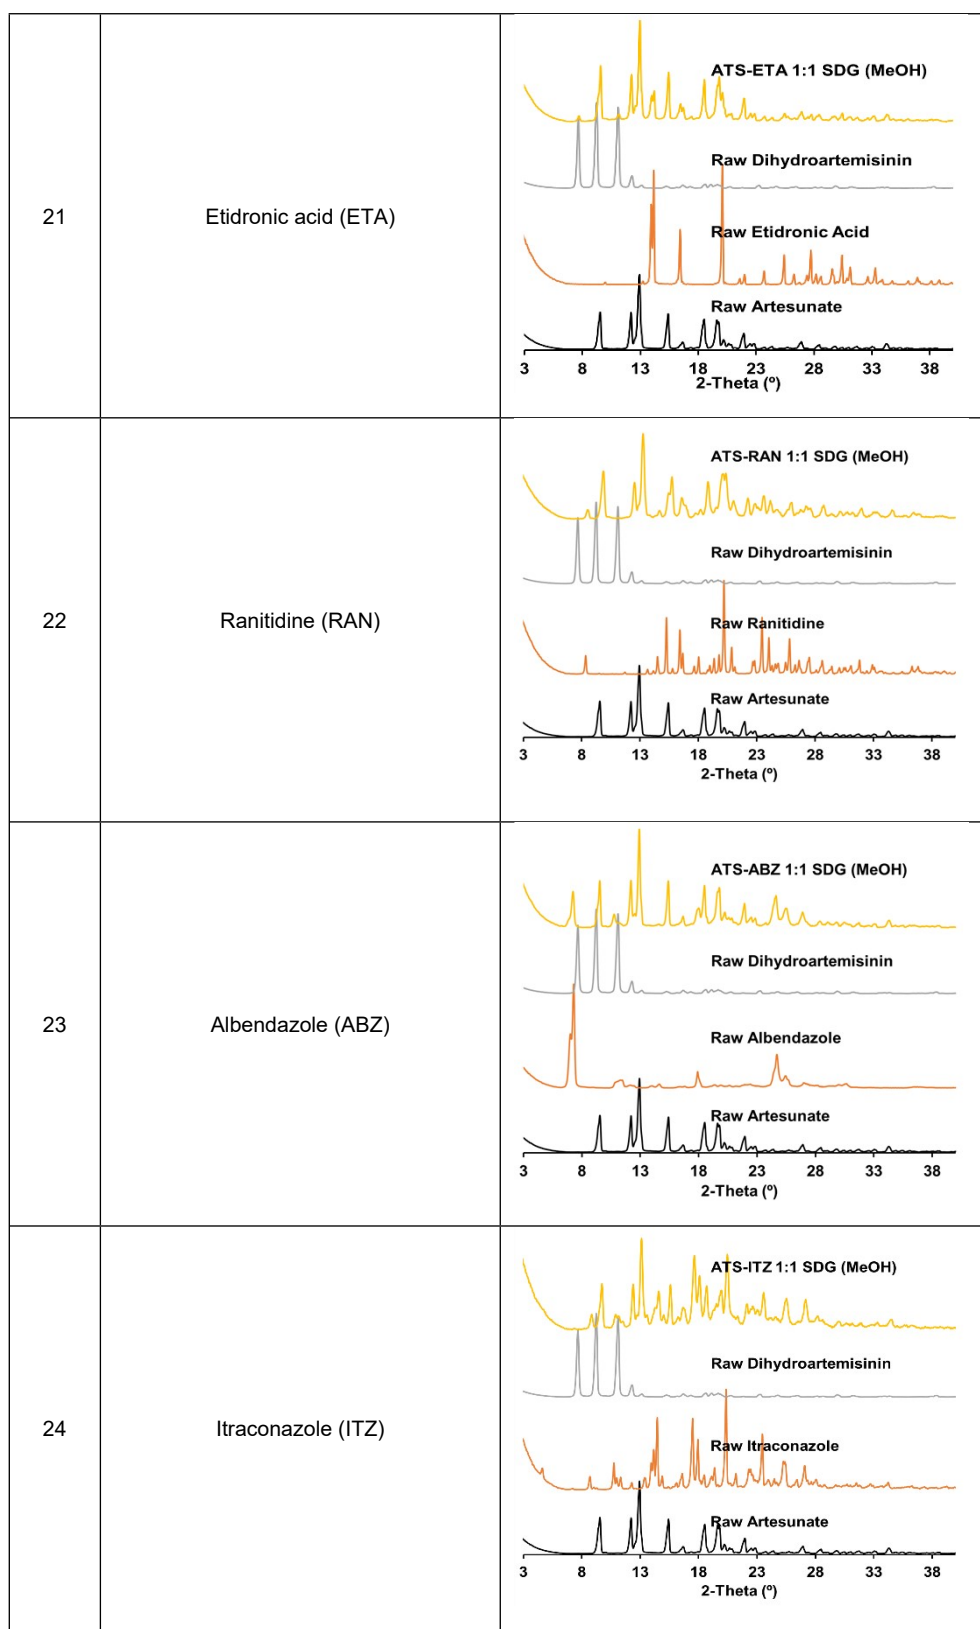

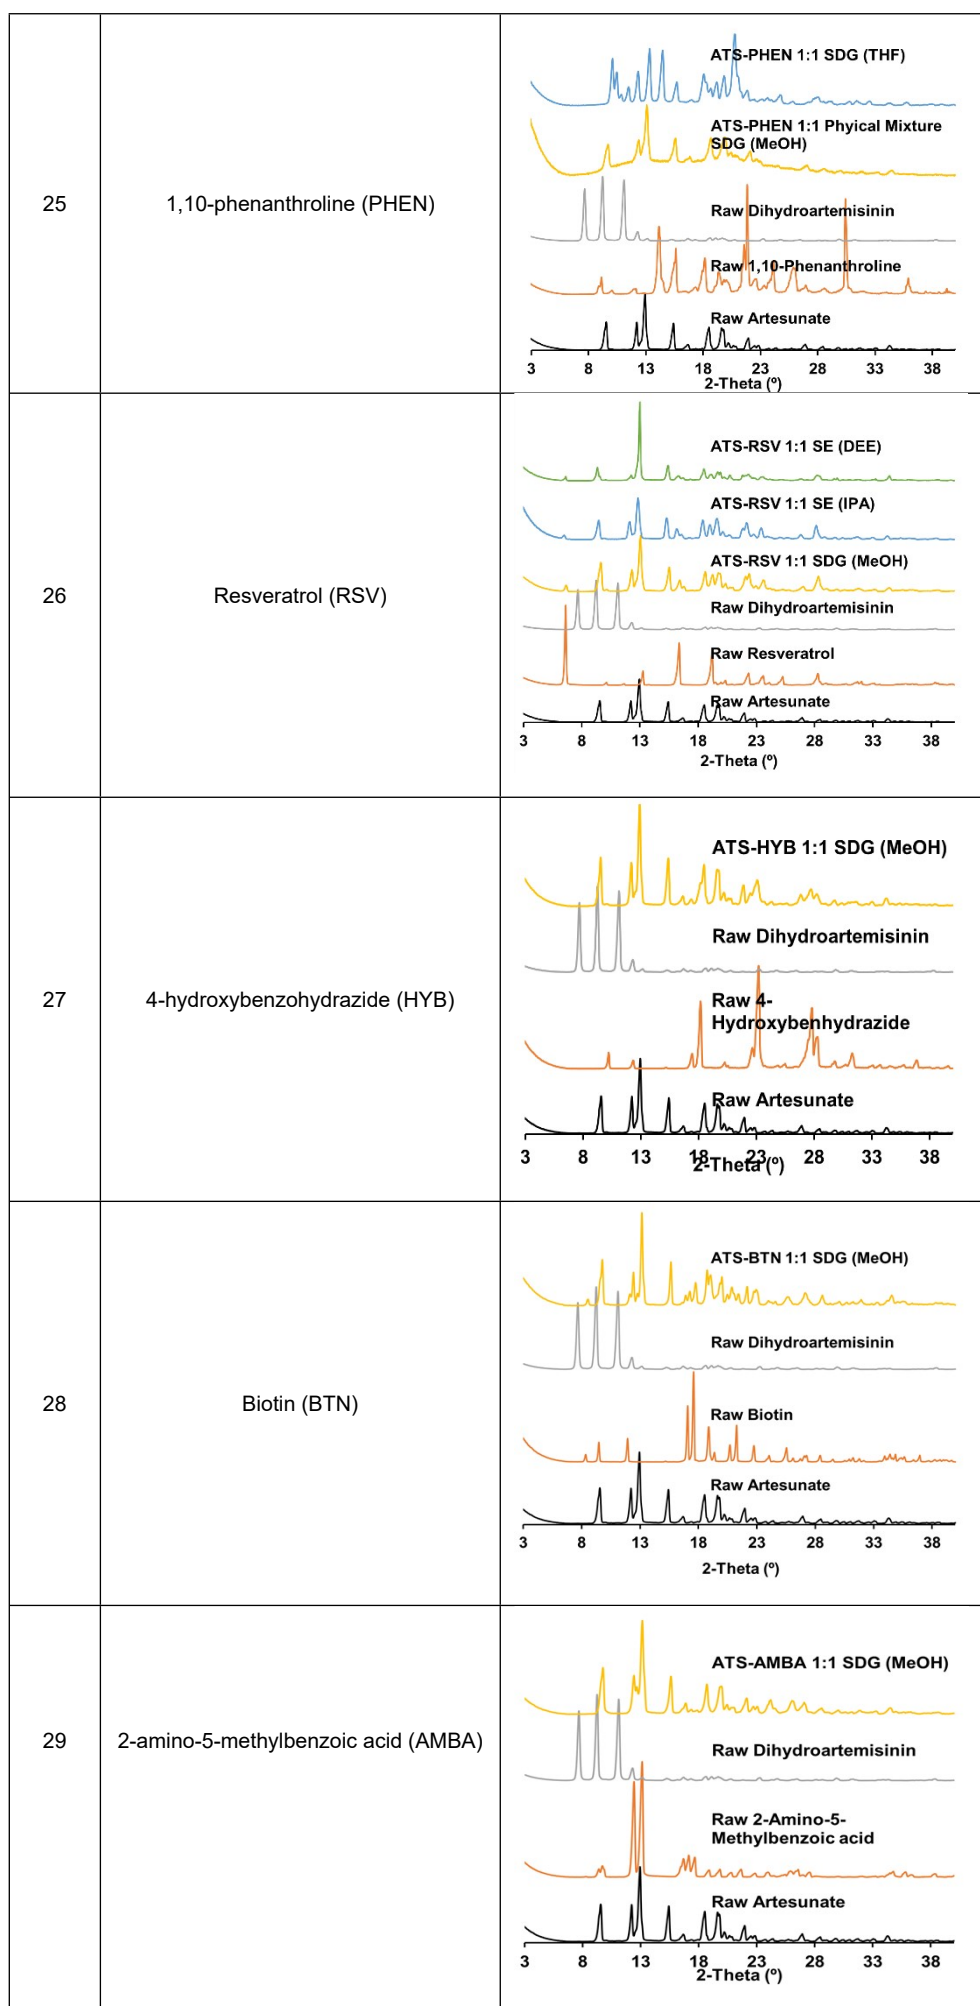



|    |                                      |                                                                                                                                                                       |
|----|--------------------------------------|-----------------------------------------------------------------------------------------------------------------------------------------------------------------------|
| 30 | Curcumin (CUR)                       | <p>ATS-CUR 1:1 SE (IPA)</p> <p>Raw Dihydroartemisinin</p> <p>Raw Curcumin</p> <p>Raw Artesunate</p> <p>2-Theta (°)</p>                                                |
| 31 | Voriconazole (VCZ)                   | <p>ATS-VCZ 1:1 SDG (MeOH)</p> <p>Raw Dihydroartemisinin</p> <p>Raw Voriconazole</p> <p>Raw Artesunate</p> <p>2-Theta (°)</p>                                          |
| 32 | 1,2-Di(pyridin-4-yl)ethane (DPE)     | <p>ATS-DPE 1:1 SE (DEE)</p> <p>ATS-DPE 1:1 SE (MeOH)</p> <p>Raw Dihydroartemisinin</p> <p>Raw 1,2-Di(pyridin-4-yl)ethane</p> <p>Raw Artesunate</p> <p>2-Theta (°)</p> |
| 33 | Acetone 1,3-dicarboxylic acid (ACDA) | <p>ATS-ACDA 1:1 SDG (MeOH)</p> <p>Raw Dihydroartemisinin</p> <p>Raw Acetone 1,3-Dicarboxylic Acid</p> <p>Raw Artesunate</p> <p>2-Theta (°)</p>                        |
| 34 | 5-Fluorouracil (FLU)                 | <p>ATS-FLU 1:1 SDG (MeOH)</p> <p>Raw Dihydroartemisinin</p> <p>Raw 5-Fluorouracil</p> <p>Raw Artesunate</p> <p>2-Theta (°)</p>                                        |



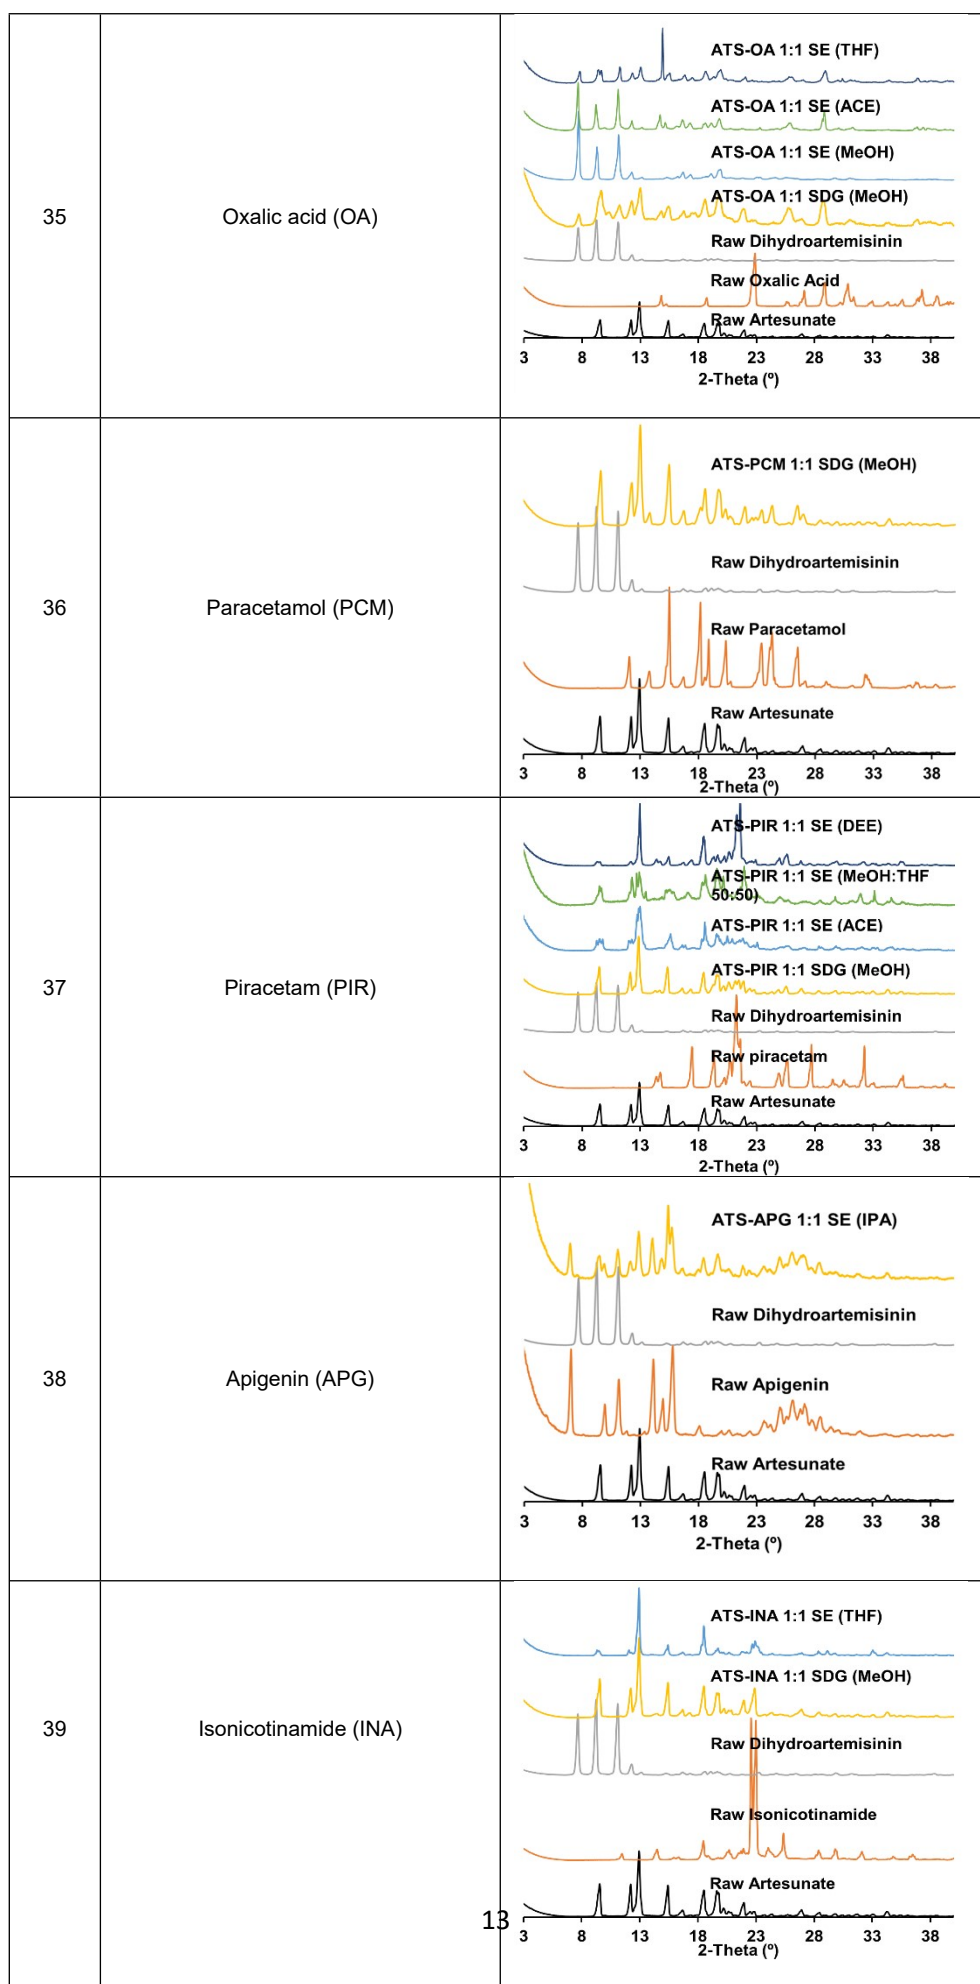

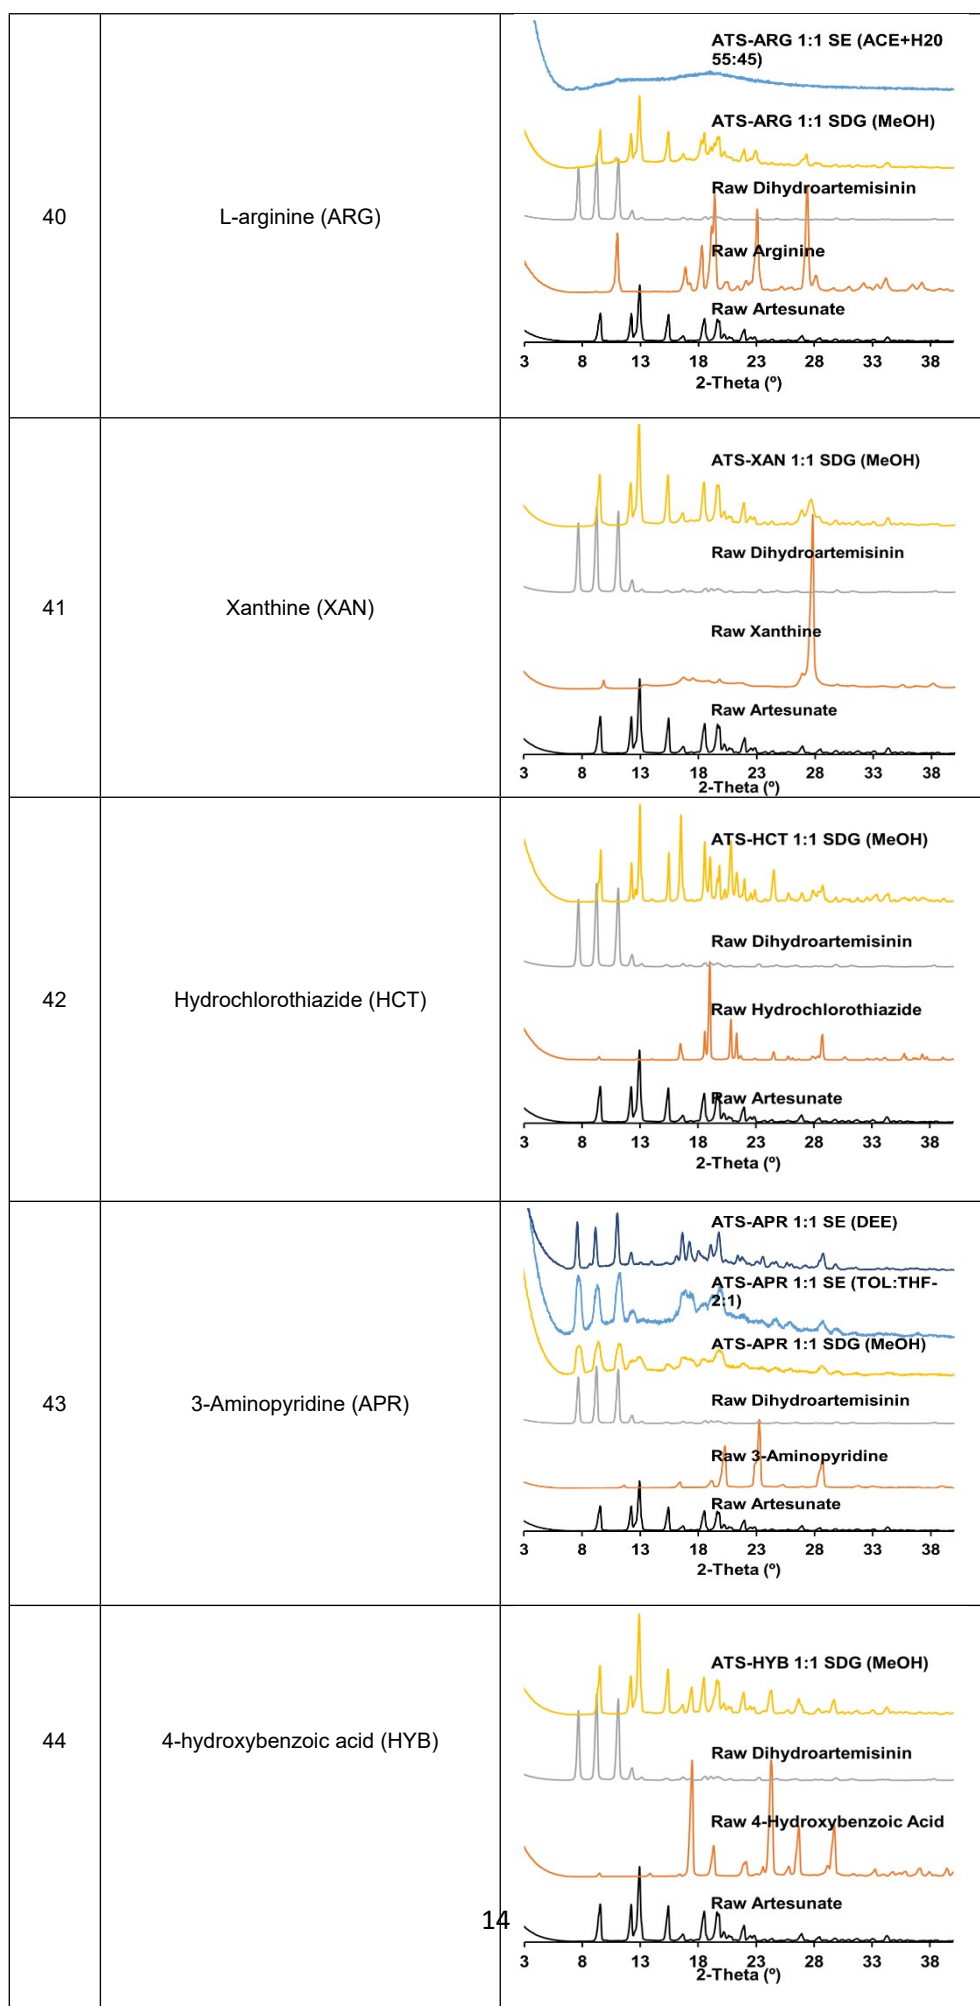

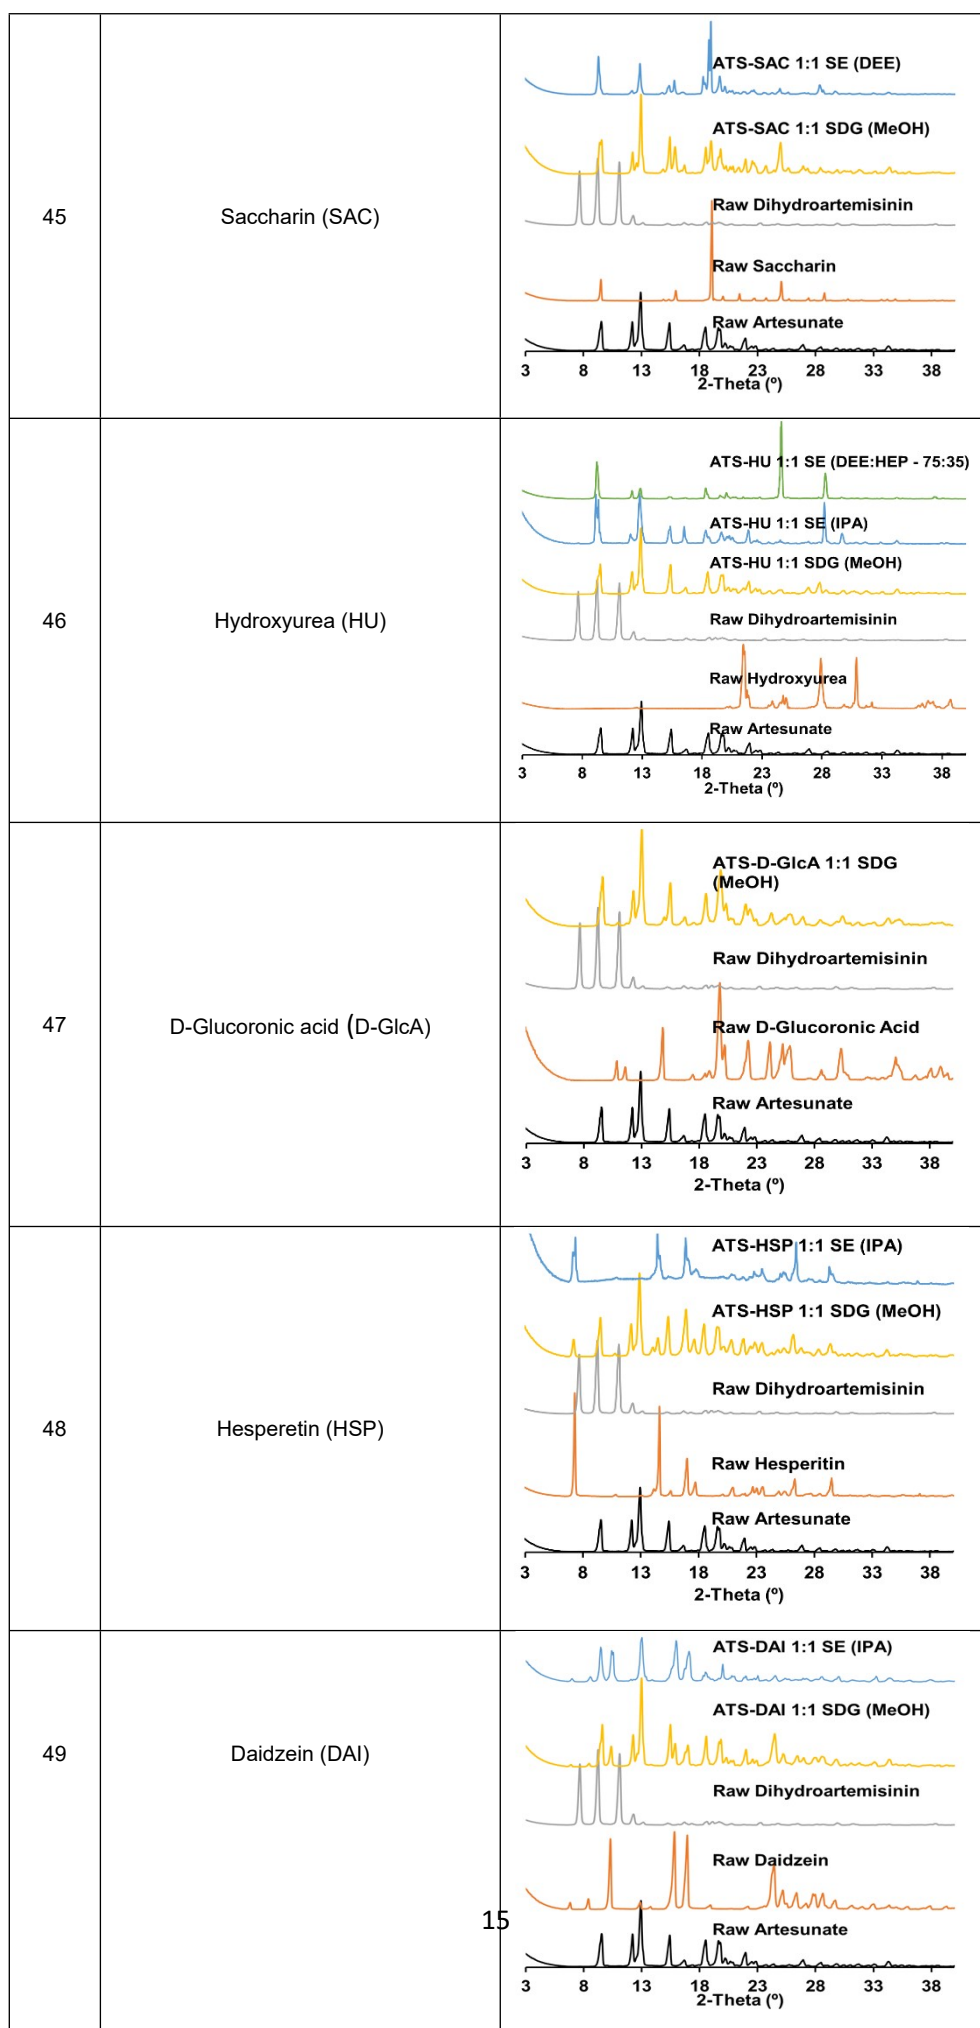

|    |                           |                                                                                                                                                          |
|----|---------------------------|----------------------------------------------------------------------------------------------------------------------------------------------------------|
| 50 | DL-Tryptophan (TRY)       | <p>ATS-TRY 1:1 SDG (MeOH)</p> <p>Raw Dihydroartemisinin</p> <p>Raw DL-Tryptophan</p> <p>Raw Artesunate</p> <p>2-Theta (°)</p>                            |
| 51 | Praziquantel (PZQ)        | <p>ATS-PZQ 1:1 SE (DEE)</p> <p>ATS-PZQ 1:1 SDG (MeOH)</p> <p>Raw Dihydroartemisinin</p> <p>Raw Praziquantel</p> <p>Raw Artesunate</p> <p>2-Theta (°)</p> |
| 52 | 4,4-bipyridine (BPY)      | <p>ATS-BPY 2:1 Cocrystal SDG (MeOH)</p> <p>Raw Dihydroartemisinin</p> <p>Raw 4,4-Bipyridine</p> <p>Raw Artesunate</p> <p>2-Theta (°)</p>                 |
| 53 | 2-Ketoglutaric acid (KEA) | <p>ATS-KEA 1:1 SDG (MeOH)</p> <p>Raw Dihydroartemisinin</p> <p>Raw 2-Ketoglutaric Acid</p> <p>Raw Artesunate</p> <p>2-Theta (°)</p>                      |
| 54 | L-Tartaric acid (L-TA)    | <p>ATS-L-TA 1:1 SDG (MeOH)</p> <p>Raw Dihydroartemisinin</p> <p>Raw L-Tartaric Acid</p> <p>Raw Artesunate</p> <p>2-Theta (°)</p>                         |

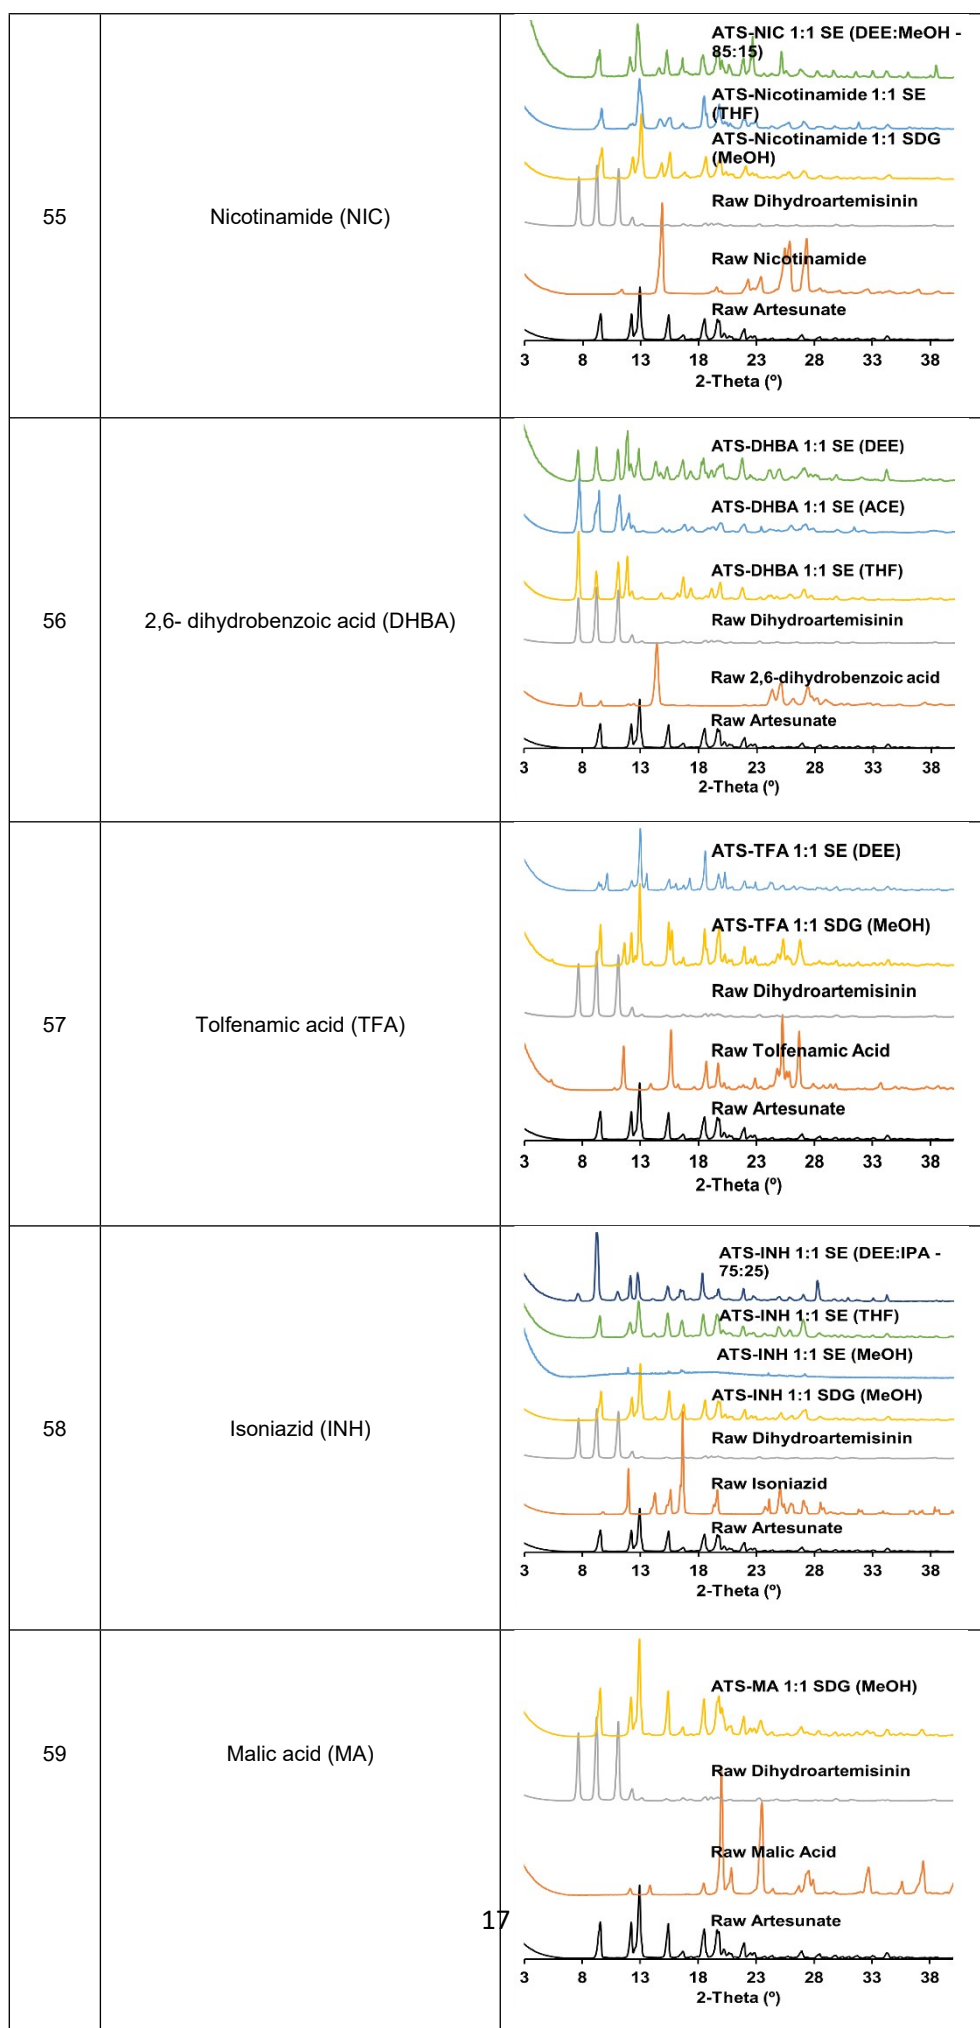

|    |                       |                                                                                                                                                                                                                  |
|----|-----------------------|------------------------------------------------------------------------------------------------------------------------------------------------------------------------------------------------------------------|
| 60 | Glycine (GLY)         | <p>ATS-GLY 1:1 SDG (MeOH)</p> <p>Raw Dihydroartemisinin</p> <p>Raw Glycine</p> <p>Raw Artesunate</p> <p>2-Theta (°)</p>                                                                                          |
| 61 | Xylitol (XLT)         | <p>ATS-XLT 1:1 SDG (MeOH)</p> <p>Raw Dihydroartemisinin</p> <p>Raw Xylitol</p> <p>Raw Artesunate</p> <p>2-Theta (°)</p>                                                                                          |
| 62 | 2-aminopyrazine (APY) | <p>ATS-APY 1:1 SE (MeOH)</p> <p>Raw Dihydroartemisinin</p> <p>Raw 2-Aminopyrazine</p> <p>Raw Artesunate</p> <p>2-Theta (°)</p>                                                                                   |
| 63 | Cinnamic acid (Trans) | <p>ATS-CNA 1:1 SDG (MeOH)</p> <p>Raw Dihydroartemisinin</p> <p>Raw Cinnamic Acid (Trans)</p> <p>Raw Artesunate</p> <p>2-Theta (°)</p>                                                                            |
| 64 | Pyrazinamide (PZA)    | <p>ATS-PZA 1:1 SE (DEE)</p> <p>ATS-PZA 1:1 SE (IPA)</p> <p>ATS-PZA 1:1 SE (THF)</p> <p>ATS-PZA 1:1 SDG (MeOH)</p> <p>Raw Dihydroartemisinin</p> <p>Raw Pyrazinamide</p> <p>Raw Artesunate</p> <p>2-Theta (°)</p> |



|    |                     |                                                                                                                                                                       |
|----|---------------------|-----------------------------------------------------------------------------------------------------------------------------------------------------------------------|
| 65 | Levetiracetam (LEV) | <p>ATS-LEV 1:1 SDG (MeOH)</p> <p>Raw Dihydroartemisinin</p> <p>Raw Levetiracetam</p> <p>Raw Artesunate</p> <p>2-Theta (°)</p>                                         |
| 66 | Muconic acid (MUCA) | <p>ATS-MUCA 1:1 SDG (MeOH)</p> <p>Raw Dihydroartemisinin</p> <p>Raw Muconic Acid</p> <p>Raw Artesunate</p> <p>2-Theta (°)</p>                                         |
| 67 | Hippuric acid (HIA) | <p>ATS-HIA 1:1 SDG (MeOH)</p> <p>Raw Dihydroartemisinin</p> <p>Raw Hippuric Acid</p> <p>Raw Artesunate</p> <p>2-Theta (°)</p>                                         |
| 68 | Imidazole (IMZ)     | <p>ATS-IMZ 1:1 SE (DEE:MeOH 70:30)</p> <p>ATS-Imidazole 1:1 SE (MeOH)</p> <p>Raw Dihydroartemisinin</p> <p>Raw Imidazole</p> <p>Raw Artesunate</p> <p>2-Theta (°)</p> |
| 69 | Aspartame (ASP-TM)  | <p>ATS-ASP-TM 1:1 SDG (MeOH)</p> <p>Raw Dihydroartemisinin</p> <p>Raw Aspartame</p> <p>Raw Artesunate</p> <p>2-Theta (°)</p>                                          |

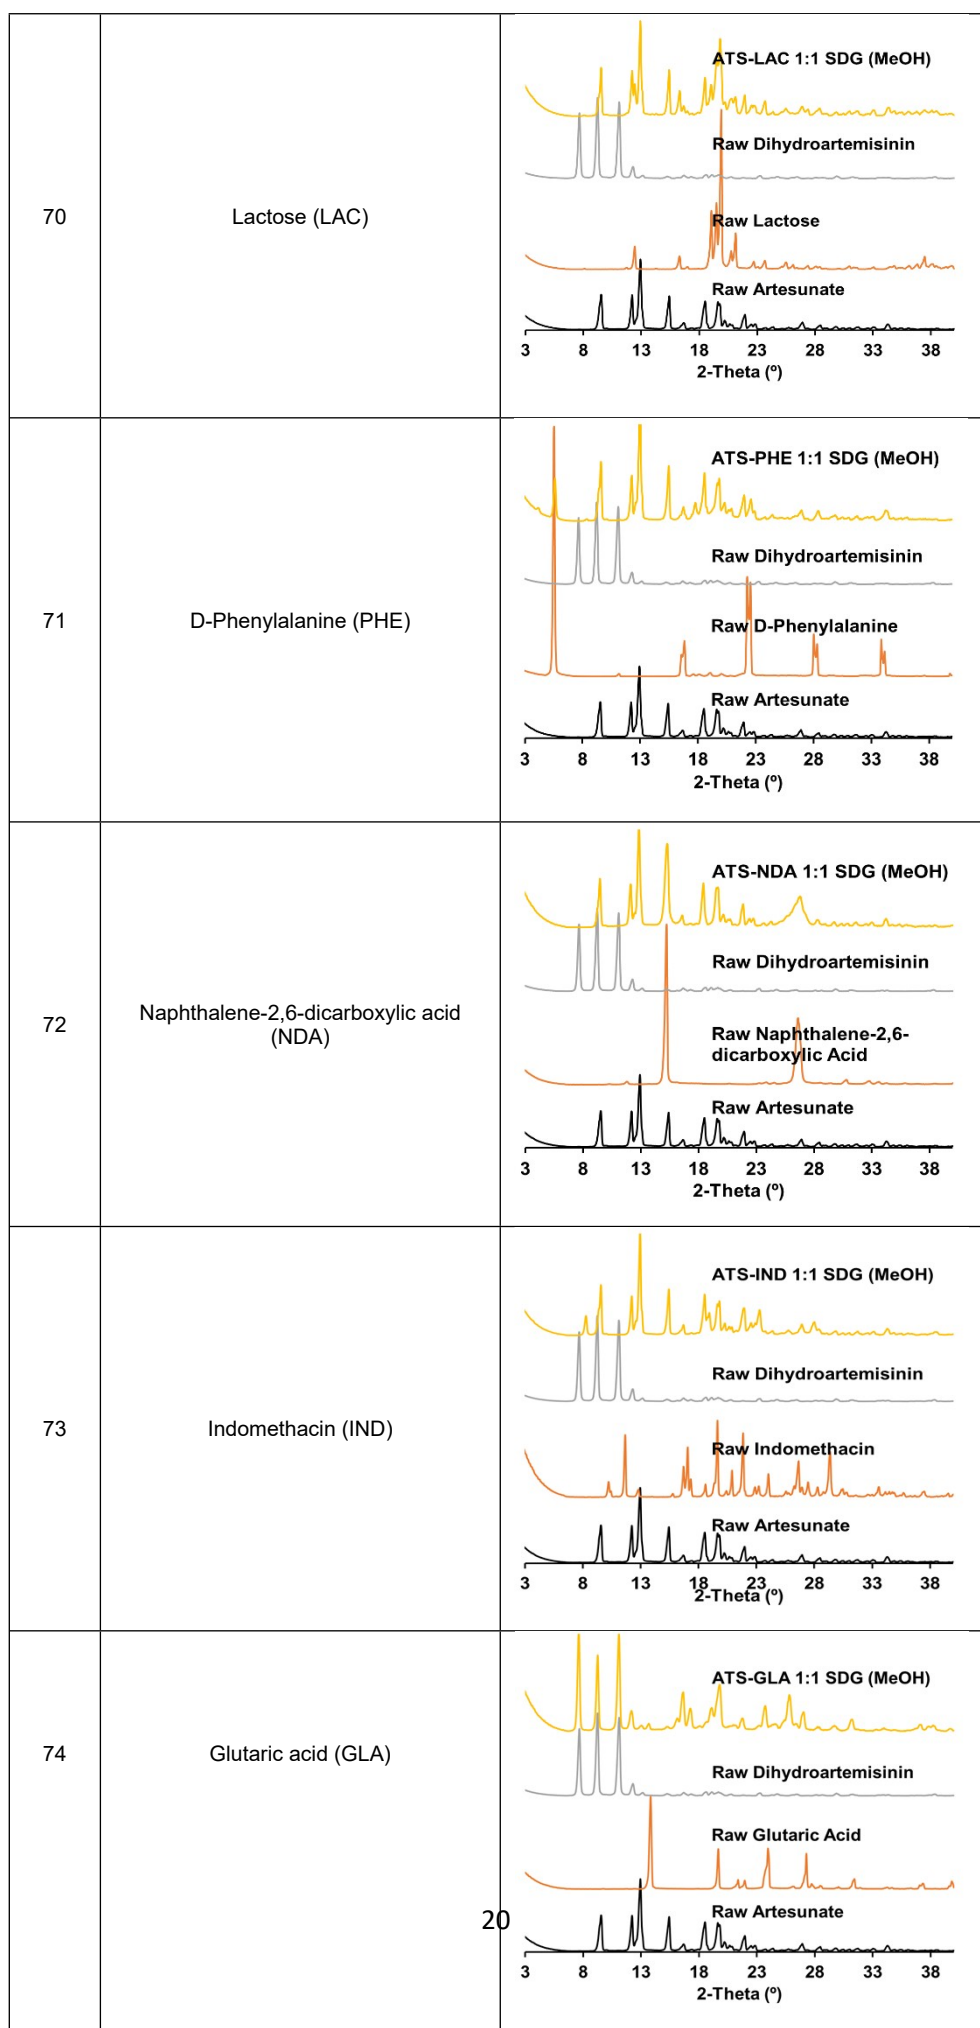



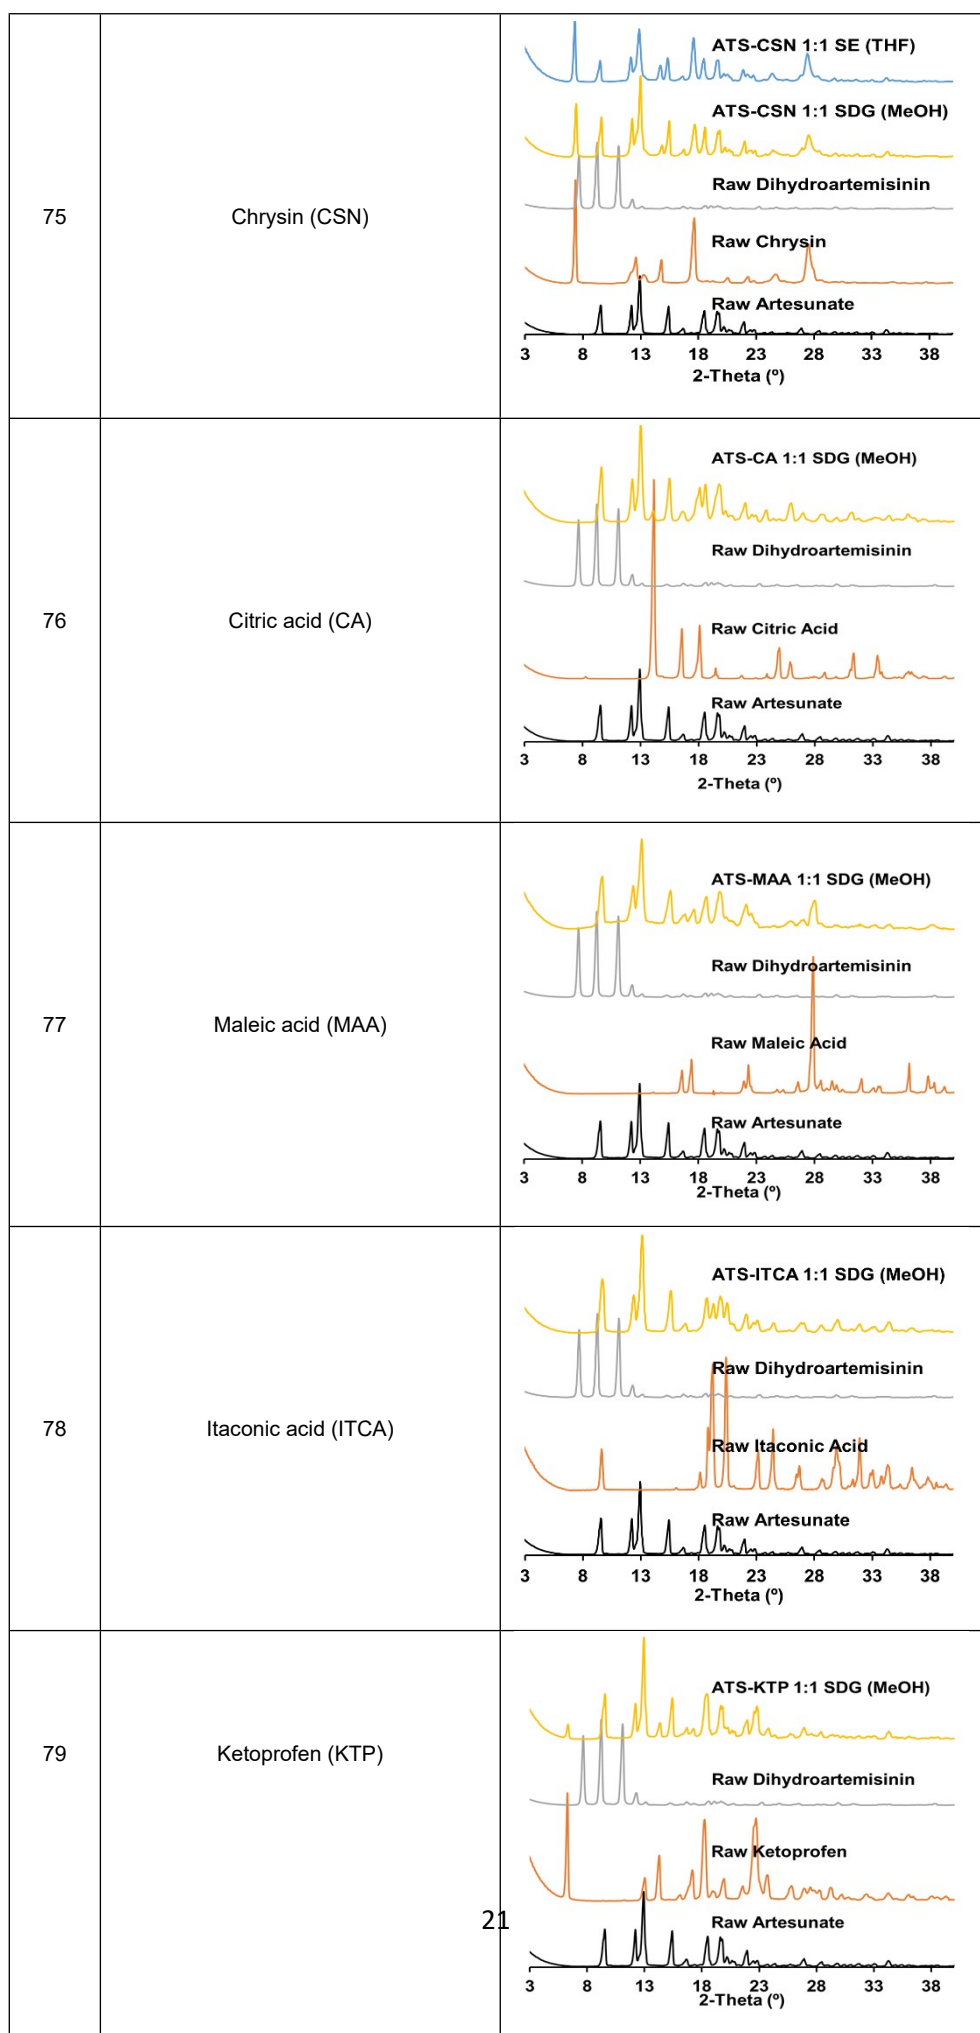

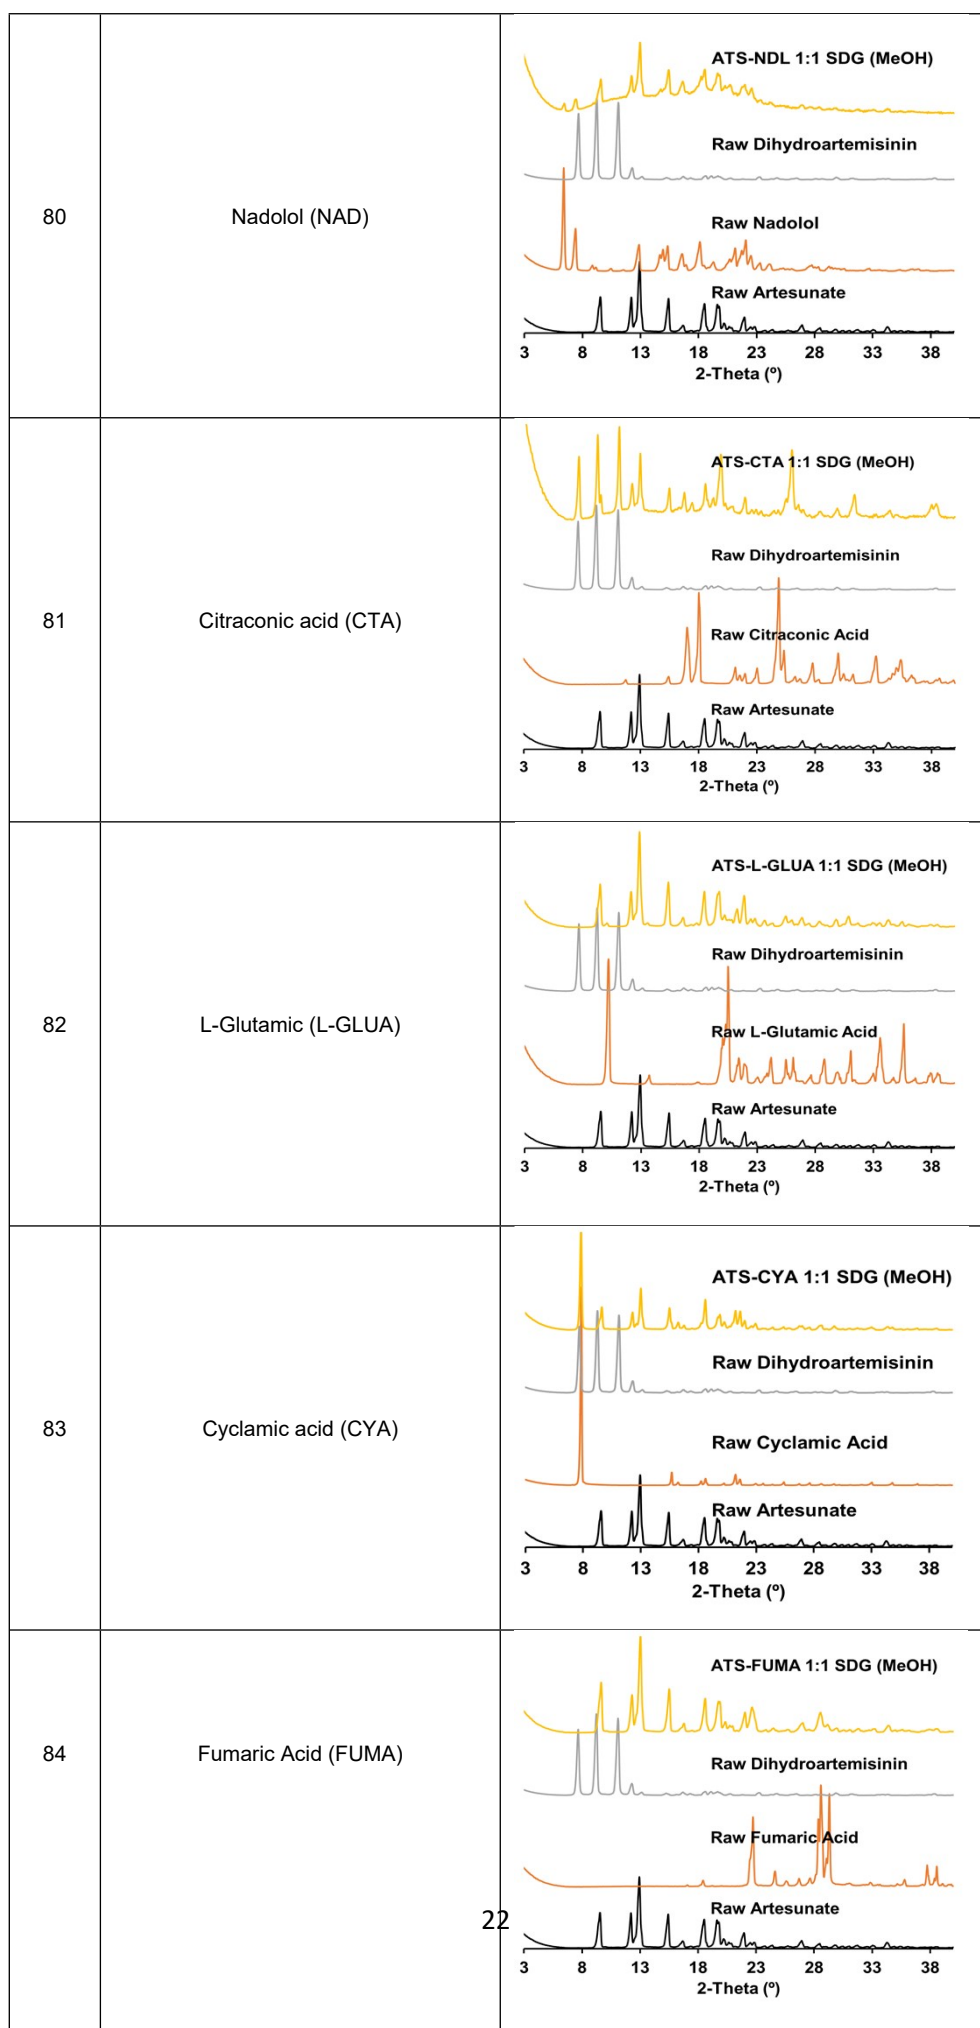

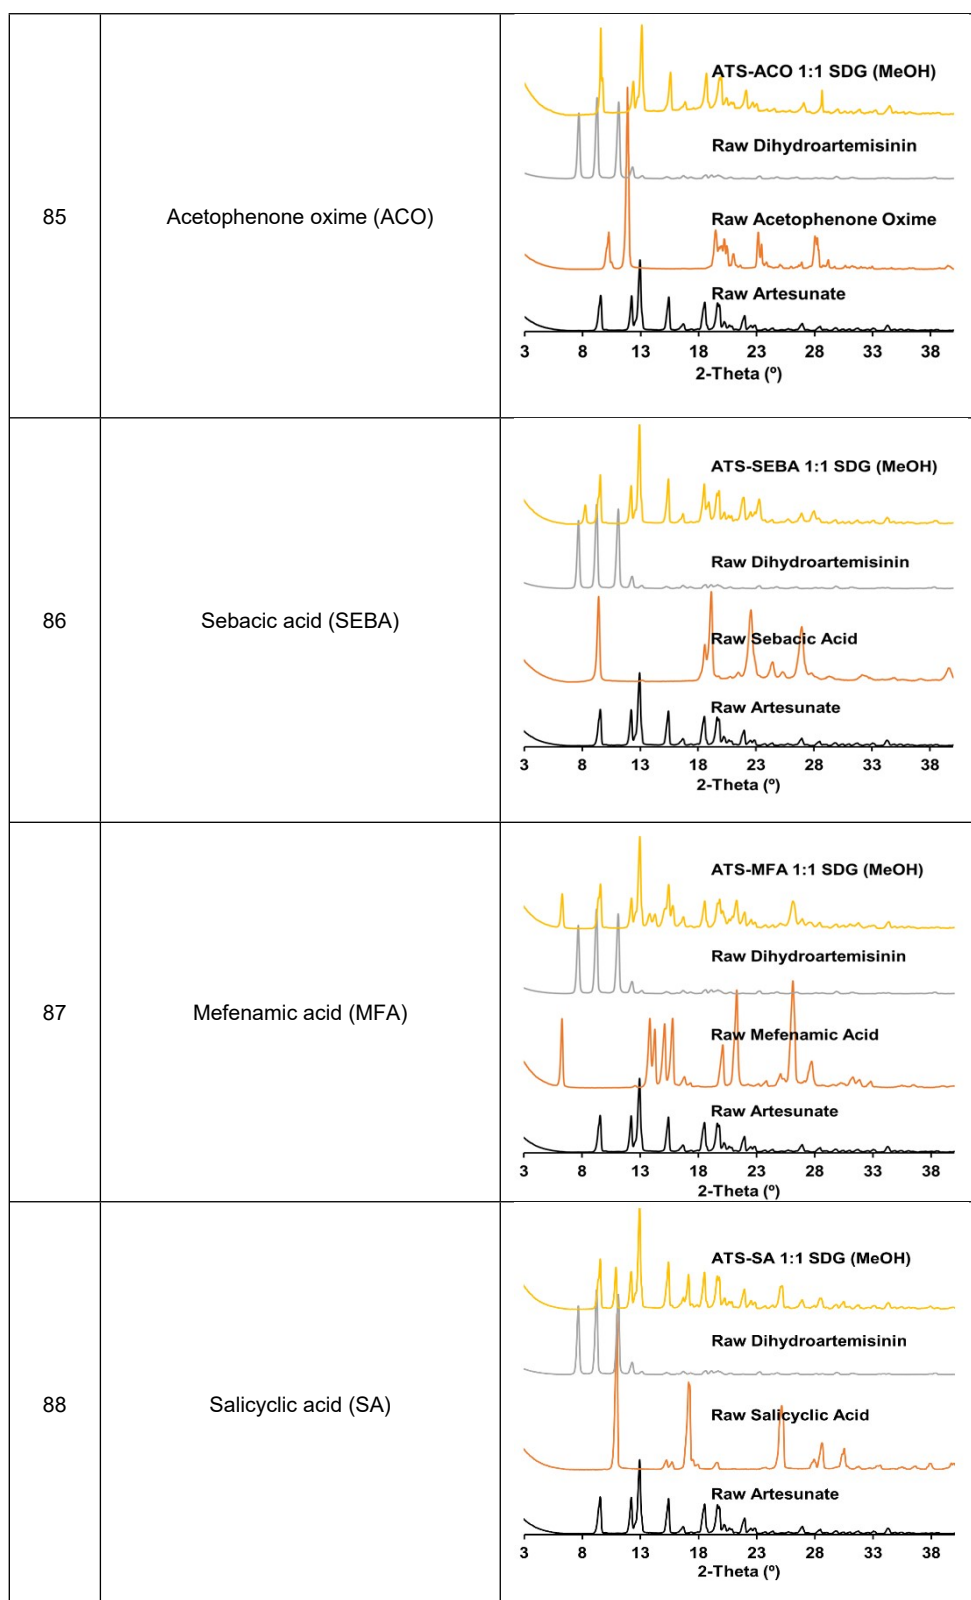

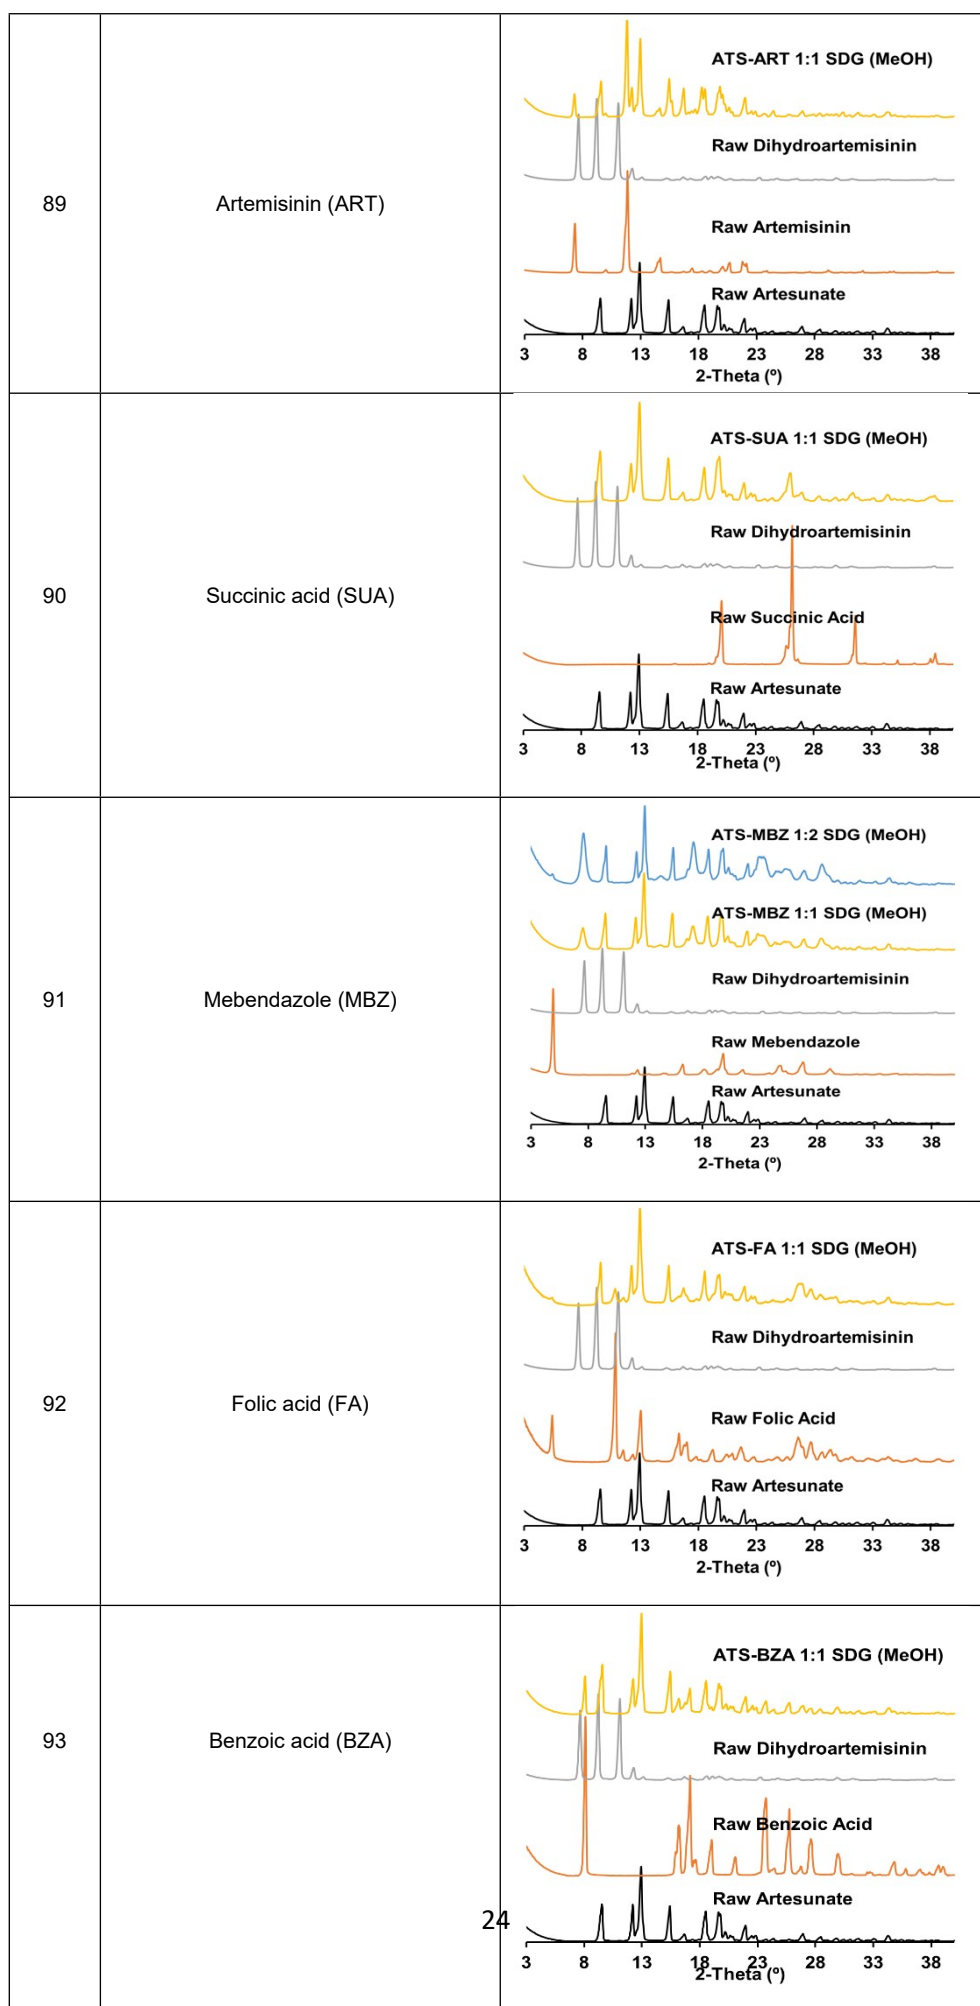

|    |                                           |                                                                                                                                                                                   |
|----|-------------------------------------------|-----------------------------------------------------------------------------------------------------------------------------------------------------------------------------------|
| 94 | Pyrazine (PYR)                            | <p>ATS-PYR 1:1 SDG (MeOH)</p> <p>Raw Dihydroartemisinin</p> <p>Raw Pyrazine</p> <p>Raw Artesunate</p> <p>2-Theta (°)</p>                                                          |
| 95 | Pimelic acid (PIA)                        | <p>ATS-PIA 1:1 SDG (MeOH)</p> <p>Raw Dihydroartemisinin</p> <p>Raw Pimelic Acid</p> <p>Raw Artesunate</p> <p>2-Theta (°)</p>                                                      |
| 96 | Caffeine (CAF)                            | <p>ATS-CAF 1:1 SE (IPA)</p> <p>ATS-CAF 1:1 SE (MeOH)</p> <p>ATS-CAF 1:1 SDG (MeOH)</p> <p>Raw Dihydroartemisinin</p> <p>Raw Caffeine</p> <p>Raw Artesunate</p> <p>2-Theta (°)</p> |
| 97 | Azelaic acid (AZA)                        | <p>ATS-AZA 1:1 SDG (MeOH)</p> <p>Raw Dihydroartemisinin</p> <p>Raw Azelaic Acid</p> <p>Raw Artesunate</p> <p>2-Theta (°)</p>                                                      |
| 98 | Ethylene Diamine Tetra Acetic Acid (EDTA) | <p>ATS-EDTA 1:1 SDG (MeOH)</p> <p>Raw Dihydroartemisinin</p> <p>Raw EDTA</p> <p>Raw Artesunate</p> <p>2-Theta (°)</p>                                                             |

|     |                         |                                                                                                                                                                                                                                             |
|-----|-------------------------|---------------------------------------------------------------------------------------------------------------------------------------------------------------------------------------------------------------------------------------------|
| 99  | Aspirin (ASP)           | <p>ATS-ASP 1:1 SDG (MeOH)</p> <p>Raw Dihydroartemisinin</p> <p>Raw Aspirin</p> <p>Raw Artesunate</p> <p>2-Theta (°)</p>                                                                                                                     |
| 100 | Terephthalic acid (TPA) | <p>ATS-TPA 1:1 SDG (MeOH)</p> <p>Raw Dihydroartemisinin</p> <p>Raw Terephthalic Acid</p> <p>Raw Artesunate</p> <p>2-Theta (°)</p>                                                                                                           |
| 101 | Phenazine (PHZ)         | <p>ATS-PHZ 1:1 SE (DDE)</p> <p>ATS-PHZ 1:1 SE (IPA)</p> <p>ATS-PHZ 1:1 SE (MeOH)</p> <p>ATS-PHZ 1:1 SDG (MeOH)</p> <p>Raw Dihydroartemisinin</p> <p>Raw Phenazine</p> <p>Raw Artesunate</p> <p>2-Theta (°)</p>                              |
| 102 | Piperazine (PIZ)        | <p>ATS-PIZ 1:1 SE (DDE)</p> <p>ATS-PIZ 1:1 SE (TOL)</p> <p>ATS-PIZ 1:1 SE (IPA)</p> <p>ATS-PIZ 1:1 SE (MeOH)</p> <p>ATS-PIZ 1:1 SDG (MeOH)</p> <p>Raw Dihydroartemisinin</p> <p>Raw Piperazine</p> <p>Raw Artesunate</p> <p>2-Theta (°)</p> |
| 103 | Isonicotinic acid (ISA) | <p>ATS-ISA 1:1 SE (MeOH)</p> <p>ATS-ISA 1:1 SDG (MeOH)</p> <p>Raw Dihydroartemisinin</p> <p>Raw Isonicotinic Acid</p> <p>Raw Artesunate</p> <p>2-Theta (°)</p>                                                                              |

|     |                                       |                                                                                                                                                                                                                            |
|-----|---------------------------------------|----------------------------------------------------------------------------------------------------------------------------------------------------------------------------------------------------------------------------|
| 104 | Suberic acid (SUBA)                   | <p>ATS-SUBA 1:1 SDG (MeOH)</p> <p>Raw Dihydroartemisinin</p> <p>Raw Suberic Acid</p> <p>Raw Artesunate</p> <p>2-Theta (°)</p>                                                                                              |
| 105 | 2-Picolinic Acid (2-PCA)              | <p>ATS-2-PCA 1:1 SE (ACE)</p> <p>ATS-2-PCA 1:1 SE (IPA)</p> <p>ATS-2-PCA 1:1 SE (EA)</p> <p>ATS-2-PCA 1:1 SE (MeOH)</p> <p>Raw Dihydroartemisinin</p> <p>Raw 2-Picolinic Acid</p> <p>Raw Artesunate</p> <p>2-Theta (°)</p> |
| 106 | 1,11-undecanedicarboxylic acid (UDCA) | <p>ATS-UDCA 1:1 SDG (MeOH)</p> <p>Raw Dihydroartemisinin</p> <p>Raw 1,11-Undecanedicarboxylic Acid</p> <p>Raw Artesunate</p> <p>2-Theta (°)</p>                                                                            |
| 107 | 2-Aminopyrimidine (AMP)               | <p>ATS-AMP 1:1 SE (MeOH)</p> <p>Raw Dihydroartemisinin</p> <p>Raw 2-Aminopyrimidine</p> <p>Raw Artesunate</p> <p>2-Theta (°)</p>                                                                                           |
| 108 | Adipic acid (ADA)                     | <p>ATS-ADA 1:1 SDG (MeOH)</p> <p>Raw Dihydroartemisinin</p> <p>Raw Adipic Acid</p> <p>Raw Artesunate</p> <p>2-Theta (°)</p>                                                                                                |



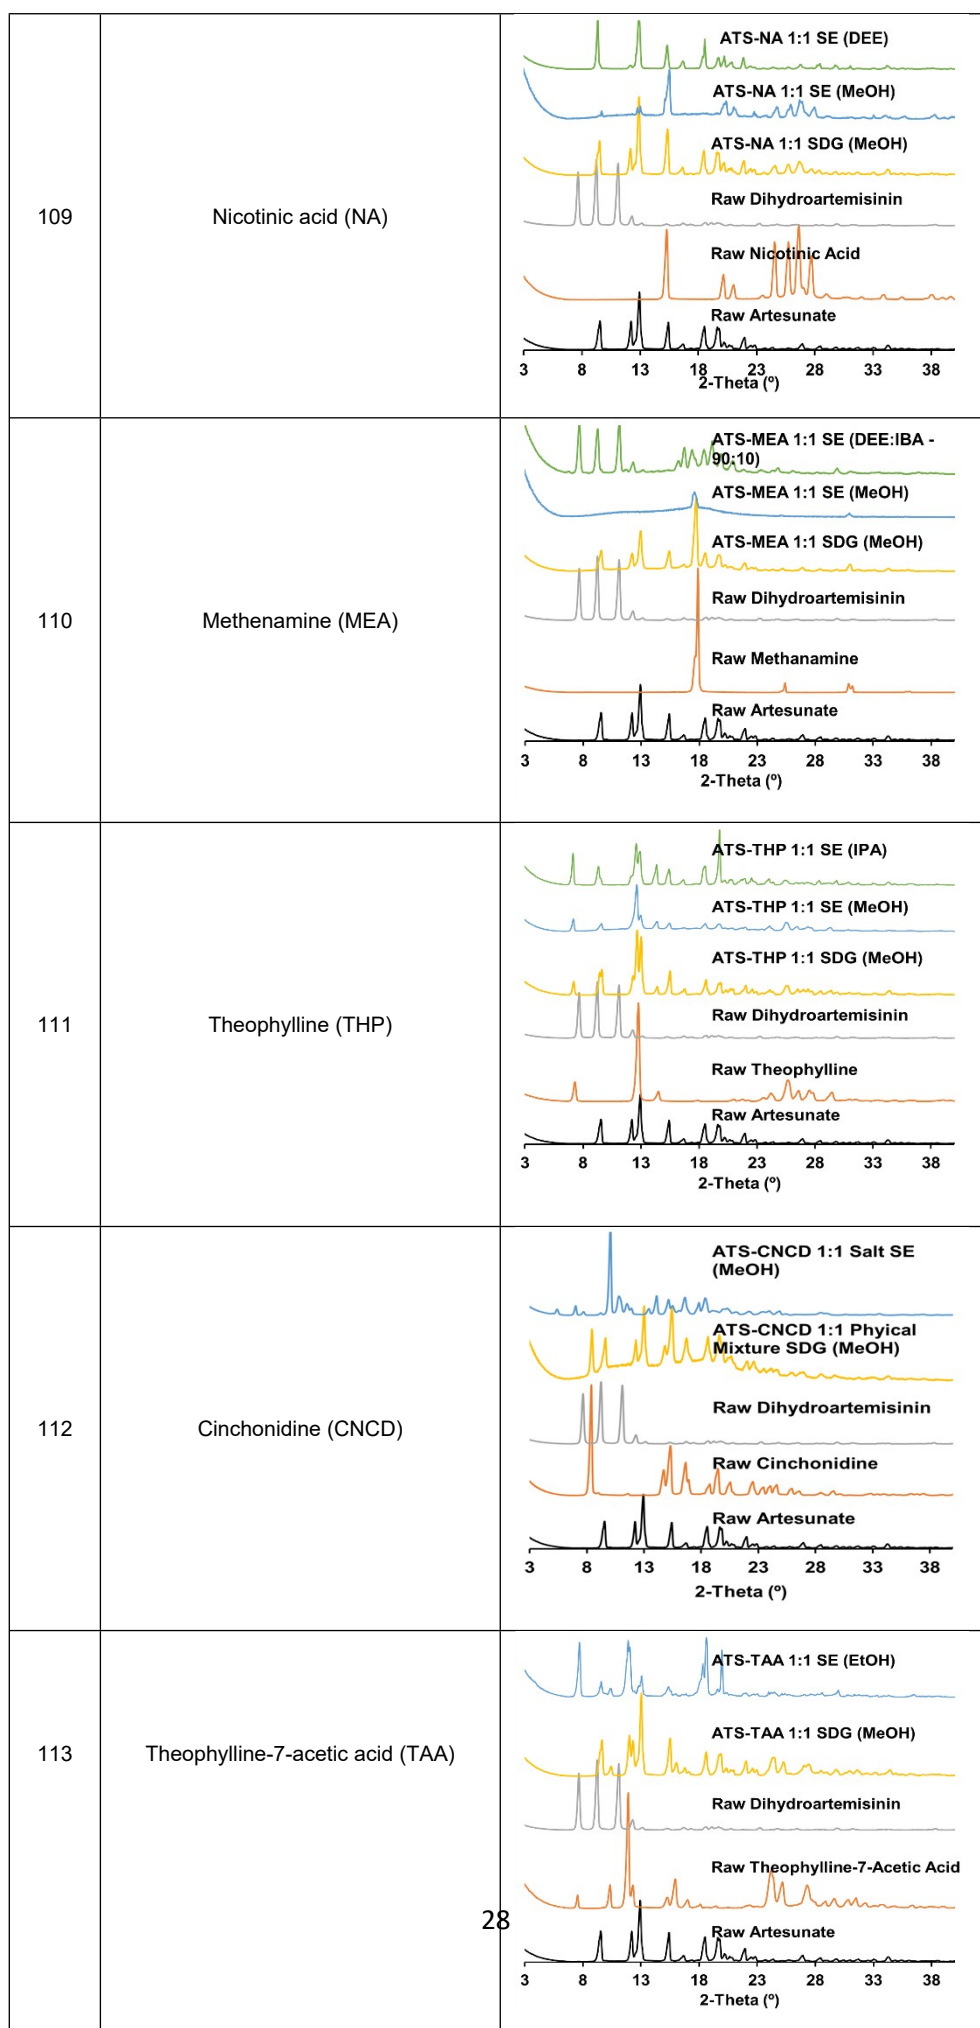



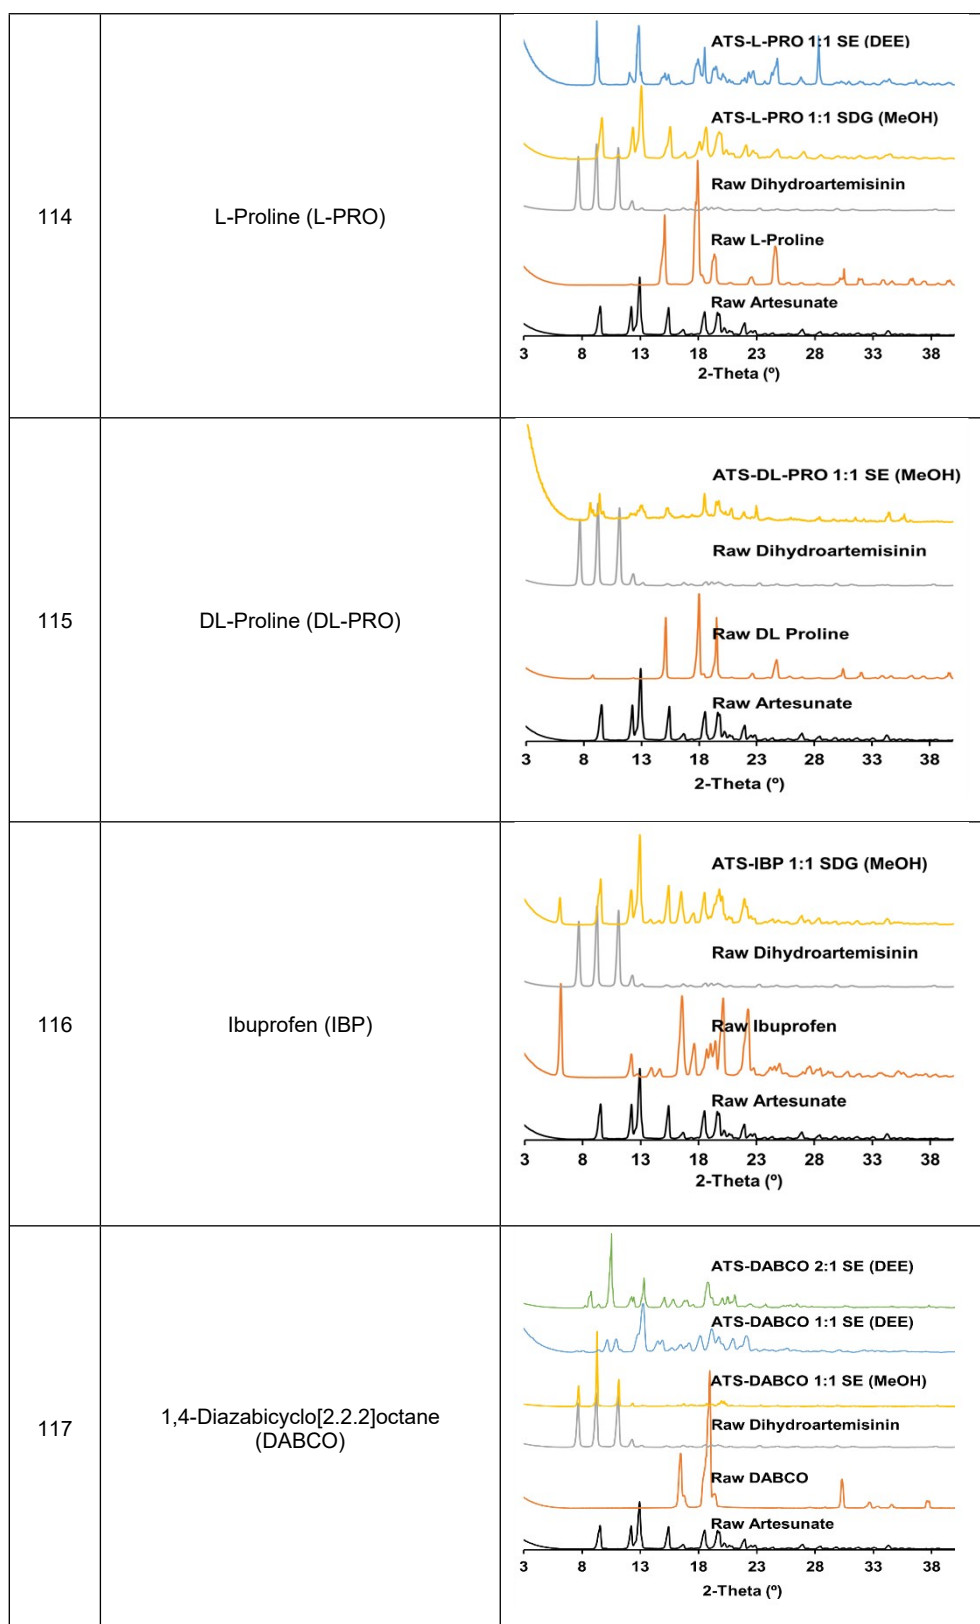

Table S5: ORTEP drawings of single-crystal X-ray structures of ATS cocrystals/salts

| ATS cocrystals | ORTEP DRAWINGS |
|----------------|----------------|
| ATS-ABA        |                |



Table S6: FTIR spectra of ATS cocrystals/Salts

| ATS cocrystal                  | FTIR spectra                                                                                                                                                                                                                                                                                                                                                                                                                             | Peak alterations                                                                                                                                                                                                                                                                                                                                                                                                                                                                                                                                                                                                                                                                                                                                                                                                                                                                                                                                                                                                                                                                             |
|--------------------------------|------------------------------------------------------------------------------------------------------------------------------------------------------------------------------------------------------------------------------------------------------------------------------------------------------------------------------------------------------------------------------------------------------------------------------------------|----------------------------------------------------------------------------------------------------------------------------------------------------------------------------------------------------------------------------------------------------------------------------------------------------------------------------------------------------------------------------------------------------------------------------------------------------------------------------------------------------------------------------------------------------------------------------------------------------------------------------------------------------------------------------------------------------------------------------------------------------------------------------------------------------------------------------------------------------------------------------------------------------------------------------------------------------------------------------------------------------------------------------------------------------------------------------------------------|
| ATS-ABA                        | 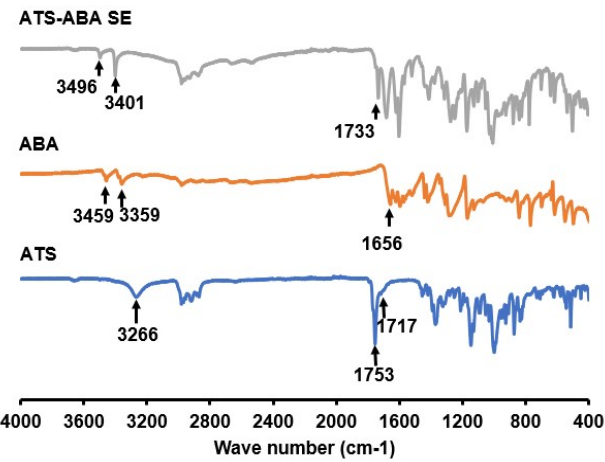 <p>FTIR spectra of ATS-ABA cocrystal. The plot shows three traces: ATS-ABA SE (grey), ABA (orange), and ATS (blue). The x-axis represents the wave number in cm<sup>-1</sup>, ranging from 4000 to 400. Key peaks are labeled with arrows: 3496, 3401, 1733, 3459, 3359, 1656, 3266, 1717, and 1753.</p>                                               | <p>In the ATS spectra, the O-H stretching band at 3266 cm<sup>-1</sup> was absent in the ATS-ABA sample due to intermolecular hydrogen bonding [1]. The carbonyl C=O stretching band, initially at 1753 cm<sup>-1</sup> in the ATS, shifted to 1733 cm<sup>-1</sup> and exhibited reduced intensity in the ATS-ABA. These shifts in the carbonyl peak positions could suggest the formation of intermolecular hydrogen bonds or alterations in the intermolecular arrangement, as corroborated by the SXRD results [2, 3].</p> <p>In the cofomer ABA, the N-H stretching vibrations initially observed at 3459 and 3359 cm<sup>-1</sup> shifted to 3496 and 3401 cm<sup>-1</sup>, respectively. This indicates that the N-H bands are still present in the IR spectra of ATS-ABA and that proton transfer has not occurred. Additionally, the carbonyl stretching band at 1656 cm<sup>-1</sup> has shifted to 1682 cm<sup>-1</sup> due to the formation of hydrogen bonding [2].</p> <p>These observations suggest that ATS-ABA is a cocrystal, as no proton transfer has been observed.</p> |
| ATS <sup>2</sup> -DABCO Form 1 |  <p>FTIR spectra of ATS<sup>2</sup>-DABCO Form 1 cocrystal. The plot shows three traces: ATS<sup>2</sup>-DABCO SE Form 1 (grey), DABCO (orange), and ATS (blue). The x-axis represents the wave number in cm<sup>-1</sup>, ranging from 4000 to 400. Key peaks are labeled with arrows: 3381, 1460, 1751, 3406, 3236, 1460, 3266, 1753, and 1753.</p> | <p>The O-H stretching band at 3266 cm<sup>-1</sup> observed in ATS appeared to have been lost in ATS<sup>2</sup>-DABCO Form 1 due to intermolecular hydrogen bonding [1]. Additionally, the carbonyl C=O stretching band at 1753 cm<sup>-1</sup> in ATS shifted to 1751 cm<sup>-1</sup> in ATS<sup>2</sup>-DABCO Form 1 and exhibited significantly reduced intensity, likely due to intermolecular hydrogen bonding [2, 3].</p> <p>The broad O-H stretching vibrations between 3406 and 3236 cm<sup>-1</sup> in the DABCO range indicate the presence of water, a finding validated by the DSC results, this stretching appeared to have shifted to 3381 cm<sup>-1</sup> with significantly reduced intensity in ATS<sup>2</sup>-DABCO Form 1 due to intermolecular hydrogen bonding [2, 3].</p>                                                                                                                                                                                                                                                                                            |

|                                                          |  |                                                                                                                                                                                                                                                                                                                                                                                                                                                                                                                                                                                                                                                                                                                                                                                                                                                                                                                                                                                                                                                                                                                                                                                                                                                                                                                                                                                                                                                                                                                                                                              |
|----------------------------------------------------------|--|------------------------------------------------------------------------------------------------------------------------------------------------------------------------------------------------------------------------------------------------------------------------------------------------------------------------------------------------------------------------------------------------------------------------------------------------------------------------------------------------------------------------------------------------------------------------------------------------------------------------------------------------------------------------------------------------------------------------------------------------------------------------------------------------------------------------------------------------------------------------------------------------------------------------------------------------------------------------------------------------------------------------------------------------------------------------------------------------------------------------------------------------------------------------------------------------------------------------------------------------------------------------------------------------------------------------------------------------------------------------------------------------------------------------------------------------------------------------------------------------------------------------------------------------------------------------------|
|                                                          |  | <p>Additionally, the sharp C-N stretching band in DABCO, originally at <math>1460\text{ cm}^{-1}</math>, was maintained but exhibited significantly reduced intensity in <math>\text{ATS}^2\text{-DABCO}</math> Form 1. This reduction in intensity could indicate the formation of intermolecular hydrogen bonds.</p> <p>Based on these observations, <math>\text{ATS}^2\text{-DABCO}</math> Form 1 can be identified as a cocrystal.</p>                                                                                                                                                                                                                                                                                                                                                                                                                                                                                                                                                                                                                                                                                                                                                                                                                                                                                                                                                                                                                                                                                                                                   |
| <p><math>\text{ATS}^2\text{-DABCO}</math><br/>Form 2</p> |  | <p>In <math>\text{ATS}^2\text{-DABCO}</math> Form 2, the O-H stretching band of ATS at <math>3266\text{ cm}^{-1}</math> appears to have merged with the broad band of DABCO at <math>3375\text{ cm}^{-1}</math>, potentially due to intermolecular hydrogen bonding with DABCO. Furthermore, the carbonyl C=O stretching band, initially observed at <math>1753\text{ cm}^{-1}</math>, appears to have split and shifted to <math>1745</math> and <math>1716\text{ cm}^{-1}</math>, exhibiting reduced intensity. This change is likely due to different chemical environments and interactions for the carbonyl groups as a result of intermolecular hydrogen bonding [2, 3] or partial deprotonation.</p> <p>The broad O-H stretching vibrations between <math>3406</math> and <math>3236\text{ cm}^{-1}</math> in the DABCO range indicate the presence of water, a finding validated by the DSC results. This band has shifted into a broader band at <math>3375\text{ cm}^{-1}</math> with increased intensity in the <math>\text{ATS}^2\text{-DABCO}</math> Form 2. The sharp C-N stretching band at <math>1460\text{ cm}^{-1}</math> shifted to <math>1458\text{ cm}^{-1}</math> in <math>\text{ATS}^2\text{-DABCO}</math> Form 2, with significantly reduced intensity, possibly due to intermolecular hydrogen bonding. Additionally, a new peak at <math>1567\text{ cm}^{-1}</math> was observed, which could be attributed to the presence of a carboxylate ion, suggesting deprotonation [1].</p> <p>These observations suggest that a salt has been formed.</p> |
| <p><math>\text{ATS}^2\text{-DPE}</math></p>              |  | <p>The O-H stretching band in DPE was lost in <math>\text{ATS}^2\text{-DPE}</math> possibly due to intermolecular hydrogen bonding [1]. The <math>1753\text{ cm}^{-1}</math> carbonyl C=O stretching in ATS shifted to <math>1750\text{ cm}^{-1}</math> in <math>\text{ATS}^2\text{-DPE}</math> with reduced intensity indicating a</p>                                                                                                                                                                                                                                                                                                                                                                                                                                                                                                                                                                                                                                                                                                                                                                                                                                                                                                                                                                                                                                                                                                                                                                                                                                      |

|          |                                                                                          |                                                                                                                                                                                                                                                                                                                                                                                                                                                                                                                                                                                                                                                                                                                                                                                  |
|----------|------------------------------------------------------------------------------------------|----------------------------------------------------------------------------------------------------------------------------------------------------------------------------------------------------------------------------------------------------------------------------------------------------------------------------------------------------------------------------------------------------------------------------------------------------------------------------------------------------------------------------------------------------------------------------------------------------------------------------------------------------------------------------------------------------------------------------------------------------------------------------------|
|          | <p>ATS<sup>2</sup>-DPE SE</p> <p>DPE</p> <p>ATS</p> <p>Wave number (cm<sup>-1</sup>)</p> | <p>potential intermolecular hydrogen bonding.</p> <p>The C-N stretching vibration at 1217 cm<sup>-1</sup> in DPE appears to have shifted to 1208 cm<sup>-1</sup> in ATS<sup>2</sup>-DPE, with increased intensity, suggesting possible intermolecular hydrogen bonding.</p> <p>These results indicate the formation of a cocrystal, as there is no evidence of protonation or deprotonation.</p>                                                                                                                                                                                                                                                                                                                                                                                 |
| ATS-PHEN | <p>ATS-PHEN SE</p> <p>PHEN</p> <p>ATS</p> <p>Wave number (cm<sup>-1</sup>)</p>           | <p>The O-H stretching band at 3266 cm<sup>-1</sup> in ATS was lost in ATS-PHEN due to intermolecular hydrogen bonding [1]. The carbonyl C=O stretching band at 1753 cm<sup>-1</sup> maintained its position but showed a reduction in intensity.</p> <p>The peak at 3362 cm<sup>-1</sup> in PHEN may be attributed to impurities, as PHEN itself does not exhibit N-H or O-H stretching vibrations. The C-N stretching vibrations observed at 1345 cm<sup>-1</sup> and 1216 cm<sup>-1</sup> in PHEN were maintained at 1345 cm<sup>-1</sup> and 1208 cm<sup>-1</sup> in ATS-PHEN, respectively, with a reduction in intensity. This change is likely due to the formation of intermolecular hydrogen bonding with no proton transfer. This shows that a cocrystal is formed.</p> |
| ATS-URE  | <p>ATS-URE SE</p> <p>URE</p> <p>ATS</p> <p>Wave number (cm<sup>-1</sup>)</p>             | <p>The O-H stretching band in ATS has shifted from 3266 cm<sup>-1</sup> to 3240 cm<sup>-1</sup> in ATS-URE, with a reduction in intensity. The carbonyl C=O stretching band at 1753 cm<sup>-1</sup> has shifted to 1556 cm<sup>-1</sup> due to the formation of intermolecular hydrogen bonding between ATS and URE [2, 3].</p> <p>The dual N-H stretching bands in URE, originally at 3328 cm<sup>-1</sup> and 3427 cm<sup>-1</sup>, have shifted to 3374 cm<sup>-1</sup> and 3437 cm<sup>-1</sup>, respectively, both with reduced intensity. The carbonyl (C=O) group band at 1676 cm<sup>-1</sup> has either been lost or shifted to 1627 cm<sup>-1</sup>. As N-H stretching bands are still</p>                                                                             |



|                                                 |                                                                                                          |                                                                                                                                                                                                                                                                                                                                                                                                                                                                                                                                                                                                                                                                                                                                                                                                                                                                                                                                                                                                                                            |
|-------------------------------------------------|----------------------------------------------------------------------------------------------------------|--------------------------------------------------------------------------------------------------------------------------------------------------------------------------------------------------------------------------------------------------------------------------------------------------------------------------------------------------------------------------------------------------------------------------------------------------------------------------------------------------------------------------------------------------------------------------------------------------------------------------------------------------------------------------------------------------------------------------------------------------------------------------------------------------------------------------------------------------------------------------------------------------------------------------------------------------------------------------------------------------------------------------------------------|
|                                                 |                                                                                                          | maintained, it suggested that no proton transfer has taken place suggesting that a cocrystal has been formed [2].                                                                                                                                                                                                                                                                                                                                                                                                                                                                                                                                                                                                                                                                                                                                                                                                                                                                                                                          |
| ATS-<br>URE-<br>CH <sub>3</sub> OH              | <p>ATS-URE-CH<sub>3</sub>OH SE</p> <p>URE</p> <p>ATS</p> <p>Wave number (cm<sup>-1</sup>)</p>            | <p>The O-H stretching band in ATS has shifted from 3266 cm<sup>-1</sup> to 3234 cm<sup>-1</sup> in ATS-URE-CH<sub>3</sub>OH with a reduction in intensity. The ATS carbonyl C=O stretching band at 1753 cm<sup>-1</sup> has shifted to 1723 cm<sup>-1</sup> in ATS-URE-CH<sub>3</sub>OH. These changes could suggest the formation of intermolecular hydrogen bonding [2, 3].</p> <p>The dual N-H stretching bands in URE, originally at 3328 cm<sup>-1</sup> and 3427 cm<sup>-1</sup>, have shifted to 3382 cm<sup>-1</sup> and 3443 cm<sup>-1</sup>, respectively, both with reduced intensity. The carbonyl (C=O) group band at 1676 cm<sup>-1</sup> has shifted to 1637 cm<sup>-1</sup>. As the N-H stretching bands were still maintained, this suggests that no proton transfer has taken place, indicating that a cocrystal has been formed [2].</p>                                                                                                                                                                                |
| ATS-<br>URE-<br>C <sub>2</sub> H <sub>6</sub> O | <p>ATS-URE-C<sub>2</sub>H<sub>6</sub>O SE</p> <p>URE</p> <p>ATS</p> <p>Wave number (cm<sup>-1</sup>)</p> | <p>The O-H stretching band in ATS has shifted from 3266 cm<sup>-1</sup> to 3240 cm<sup>-1</sup> in ATS-URE- C<sub>2</sub>H<sub>6</sub>O with a reduction in intensity. The ATS carbonyl C=O stretching band at 1753 cm<sup>-1</sup> has shifted to 1755 cm<sup>-1</sup> in ATS-URE-C<sub>2</sub>H<sub>6</sub>O with significantly reduced intensity. These changes could suggest the formation of intermolecular hydrogen bonding between ATS, URE, and C<sub>2</sub>H<sub>6</sub>O [2, 3].</p> <p>The dual N-H stretching bands in URE, originally at 3328 cm<sup>-1</sup> and 3427 cm<sup>-1</sup>, have shifted to 3380 cm<sup>-1</sup> and 3445 cm<sup>-1</sup>, respectively, both with reduced intensity. The carbonyl (C=O) group band at 1676 cm<sup>-1</sup> has shifted to 1630 cm<sup>-1</sup>. As the N-H stretching bands were still maintained and no significant change in the positions of the C=O stretching, this suggests that no proton transfer has taken place, indicating that a cocrystal has been formed [2].</p> |
| ATS-<br>URE-<br>C <sub>2</sub> H <sub>3</sub> N |                                                                                                          | <p>The O-H stretching band in ATS has shifted from 3266 cm<sup>-1</sup> to 3233 cm<sup>-1</sup> in ATS-URE- C<sub>2</sub>H<sub>3</sub>N with a reduction in intensity. The ATS carbonyl C=O stretching band at 1753 cm<sup>-1</sup> has shifted to</p>                                                                                                                                                                                                                                                                                                                                                                                                                                                                                                                                                                                                                                                                                                                                                                                     |

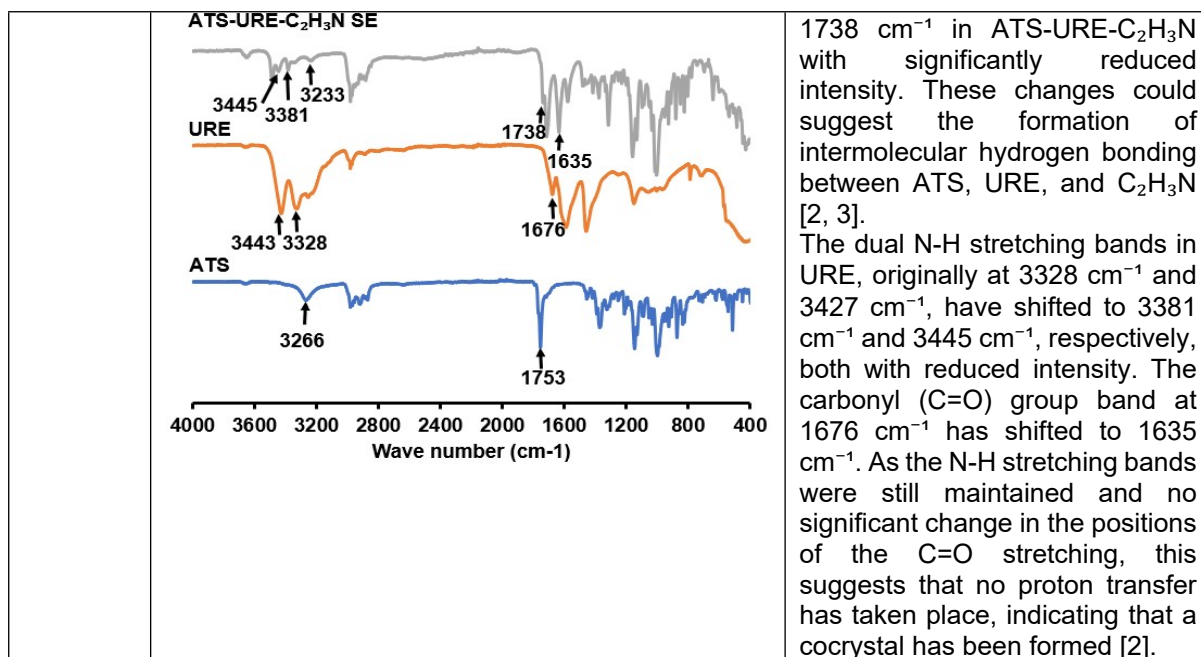



Table S7: Calibration model of ATS using HPLC (methanol was employed to prepare all the solutions measured). The concentration units are in µg/mL; Cr: theoretical concentration of the validation sample and Cm: measured concentration of the validation sample.

| Calibration Curve range (µg/mL) | Concentration points (µg/mL)      | Calibration graph                                                                  | Validation samples     |                        |                                    |
|---------------------------------|-----------------------------------|------------------------------------------------------------------------------------|------------------------|------------------------|------------------------------------|
|                                 |                                   |                                                                                    | C <sub>r</sub> (µg/mL) | C <sub>m</sub> (µg/mL) | $\frac{C_m - C_r}{C_r} \times 100$ |
| 5 - 500                         | 5, 10, 20, 50, 100, 150, 250, 500 | 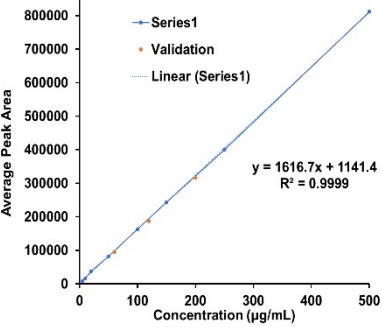 | 60                     | 62.31                  | 3.84                               |
|                                 |                                   |                                                                                    | 120                    | 118.90                 | 0.92                               |
|                                 |                                   |                                                                                    | 200                    | 199.14                 | 0.43                               |

Table S8: Calibration model of DHA using HPLC (methanol was employed to prepare all the solutions measured). The concentration units are in µg/mL; Cr: theoretical concentration of the validation sample and Cm: measured concentration of the validation sample.

| Calibration Curve range (µg/mL) | Concentration points (µg/mL)      | Calibration graph                                                                    | Validation samples     |                        |                                    |
|---------------------------------|-----------------------------------|--------------------------------------------------------------------------------------|------------------------|------------------------|------------------------------------|
|                                 |                                   |                                                                                      | C <sub>r</sub> (µg/mL) | C <sub>m</sub> (µg/mL) | $\frac{C_m - C_r}{C_r} \times 100$ |
| 1.875 - 150                     | 1.875, 3.75, 7.5, 15, 30, 90, 150 | 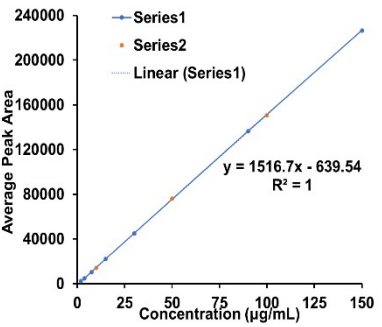 | 10                     | 9.83                   | 1.74                               |
|                                 |                                   |                                                                                      | 50                     | 50.52                  | 1.04                               |
|                                 |                                   |                                                                                      | 100                    | 99.8                   | 0.20                               |

Table S9: Single Cocystal images and Morphology prediction

| Cocrystal sample                            | Single cocystal image |  | Morphology prediction                                             |
|---------------------------------------------|-----------------------|--|-------------------------------------------------------------------|
| ATS-ABA                                     |                       |  |                                                                   |
| ATS <sup>2</sup> -DABCO<br>Form 1           |                       |  |                                                                   |
| ATS <sup>2</sup> -DABCO<br>Form 2           |                       |  |                                                                   |
| ATS <sup>2</sup> -DPE                       |                       |  |                                                                   |
| ATS-PHEN                                    |                       |  |                                                                   |
| ATS-URE                                     |                       |  |                                                                   |
| ATS-URE-<br>CH <sub>3</sub> OH              |                       |  |                                                                   |
| ATS-URE-<br>C <sub>2</sub> H <sub>6</sub> O |                       |  | The structure was not determined due to poor diffraction quality. |
| ATS-URE-<br>C <sub>2</sub> H <sub>3</sub> N |                       |  |                                                                   |

Table S10: Combined ATS + DHA concentrations in MeOH (100%), MeOH (50%), MeOH (20%), MeOH (10%), and MeOH (5) in comparison to the starting concentration at 0 minute.

| Time<br>(Minutes) | MeOH<br>(100 %) | MeOH (50%)<br>+<br>DDW (50%) | MeOH (20%)<br>+<br>DDW (80%) | MeOH (10%)<br>+<br>DDW (90%) | MeOH (5%)<br>+<br>DDW (95%) |
|-------------------|-----------------|------------------------------|------------------------------|------------------------------|-----------------------------|
|                   | µg/mL           | µg/mL                        | µg/mL                        | µg/mL                        | µg/mL                       |
| 0                 | 93.20           | 103.87                       | 97.03                        | 96.62                        | 82.68                       |
| 50                | 93.73           | 102.05                       | 96.33                        | 94.45                        | 83.94                       |
| 100               | 93.37           | 102.31                       | 95.53                        | 93.95                        | 81.79                       |
| 150               | 93.19           | 101.87                       | 95.05                        | 93.30                        | 80.87                       |
| 200               | 92.72           | 101.47                       | 95.01                        | 92.88                        | 80.68                       |
| 250               | 93.66           | 101.89                       | 94.86                        | 91.83                        | 79.98                       |
| 300               | 92.81           | 101.26                       | 93.66                        | 91.53                        | 79.07                       |
| 350               | 93.31           | 100.50                       | 93.17                        | 90.78                        | 79.09                       |
| 400               | 92.90           | 101.14                       | 91.42                        | 89.83                        | 78.16                       |
| 450               | 93.10           | 100.12                       | 92.13                        | 89.74                        | 77.52                       |
| 500               | 93.32           | 100.60                       | 91.72                        | 89.15                        | 77.60                       |
| 550               | 93.25           | 99.88                        | 91.69                        | 88.22                        | 77.02                       |
| 600               | 93.26           | 100.75                       | 90.51                        | 88.22                        | 76.44                       |
| 650               | 92.45           | 100.11                       | 90.70                        | 87.61                        | 76.78                       |
| 700               | 93.25           | 99.71                        | 90.38                        | 87.61                        | 75.85                       |
| 750               | 92.87           | 100.46                       | 90.33                        | 87.45                        | 75.67                       |
| 800               | 93.23           | 99.55                        | 89.10                        | 86.93                        | 75.88                       |
| 900               | 93.29           | 99.67                        | 90.10                        | 87.16                        | 75.11                       |
| 950               | 93.13           | 99.52                        | 89.78                        | 86.64                        | 75.26                       |
| 1000              | 93.71           | 99.68                        | 89.03                        | 86.14                        | 74.18                       |
| 1050              | 93.46           | 99.39                        | 88.72                        | 85.90                        | 74.92                       |
| 1100              | 93.13           | 98.83                        | 88.22                        | 85.98                        | 74.46                       |
| 1150              | 93.65           | 98.79                        | 88.58                        | 86.27                        | 74.12                       |
| 1200              | 93.18           | 98.86                        | 87.34                        | 85.12                        | 74.70                       |
| 1250              | 93.24           | 98.50                        | 87.67                        | 86.04                        | 74.27                       |
| 1300              | 92.75           | 97.80                        | 87.58                        | 84.91                        | 73.34                       |
| 1350              | 92.95           | 98.06                        | 87.44                        | 84.09                        | 73.44                       |
| 1400              | 92.33           | 97.59                        | 88.02                        | 84.36                        | 72.10                       |
| 1450              | 92.98           | 97.19                        | 87.15                        | 84.80                        | 74.01                       |
| 1500              | 92.80           | 97.06                        | 86.21                        | 83.31                        | 72.72                       |
| 1550              | 92.76           | 96.79                        | 86.03                        | 84.18                        | 72.34                       |

Table S11: ATS and ATS cocrystals/salts PXRD and FTIR measurements after the stress testing

| ATS cocrystal                  | PXRD spectra | FTIR spectra | Note                                                                                                                                                                                                                                                  |
|--------------------------------|--------------|--------------|-------------------------------------------------------------------------------------------------------------------------------------------------------------------------------------------------------------------------------------------------------|
| ATS-ABA                        |              |              | The ATS-ABA cocrystal demonstrates a broken crystal lattice from day 10, as evidenced by the amorphous characteristics observed in the PXRD spectra.                                                                                                  |
| ATS                            |              |              | A mixture of raw ATS and DHA was observed, with both spectra present from the 5th day of stress testing, suggesting the transformation of ATS to DHA, similar to HPLC results.                                                                        |
| ATS <sup>2</sup> -DABCO Form 2 |              |              | The ATS <sup>2</sup> -DABCO Form 2 salt spectra reveal a mixture of ATS, salt, and DHA. The intensity of the DHA spectra increased with the duration of exposure to stress testing, indicating an increased DHA concentration, as shown in Figure S3. |
| ATS <sup>2</sup> -DPE          |              |              | The ATS <sup>2</sup> -DPE cocrystal/salt formed a mixture containing ATS, DHA, and ATS <sup>2</sup> -DPE, validating the HPLC findings indicating a blend of DHA and ATS.                                                                             |

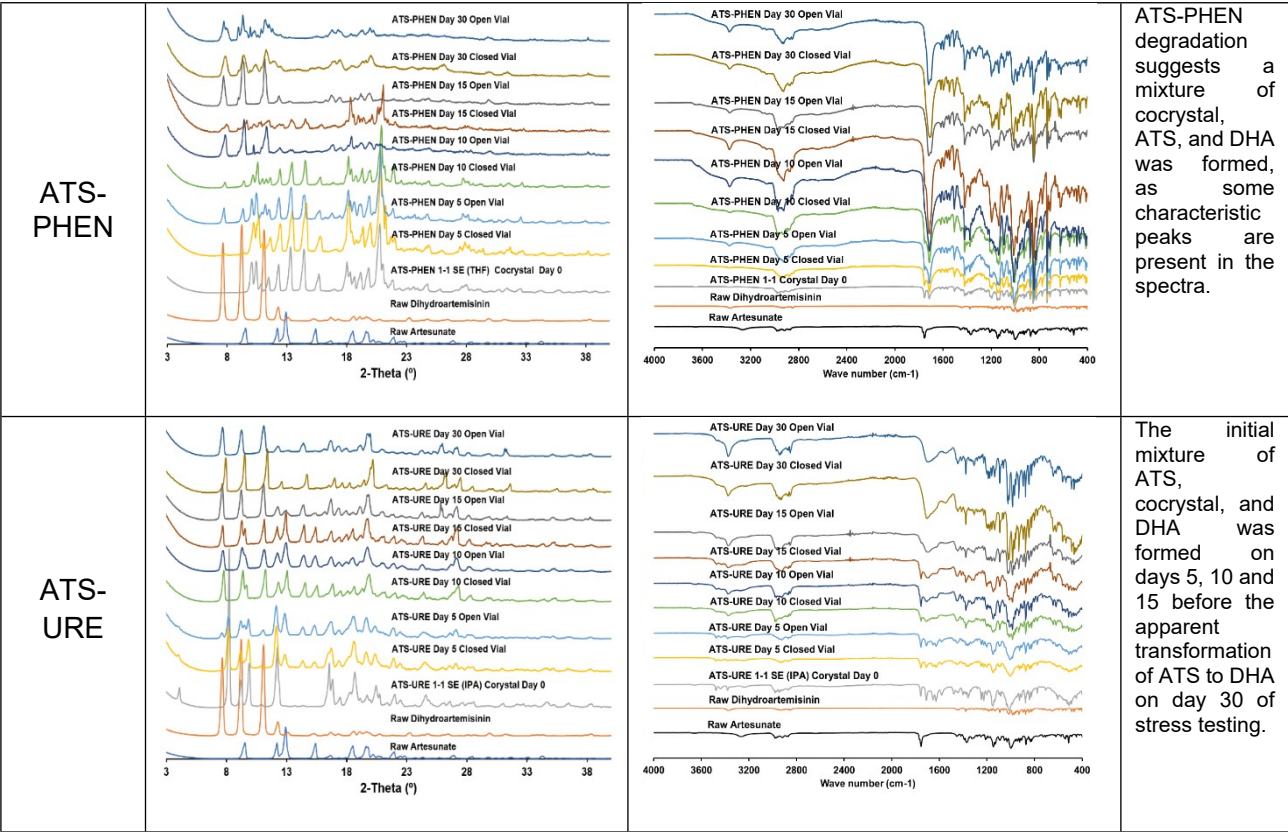



Table S12: Raw ATS and ATS cocrystals/salts DSC measurements after the stress testing

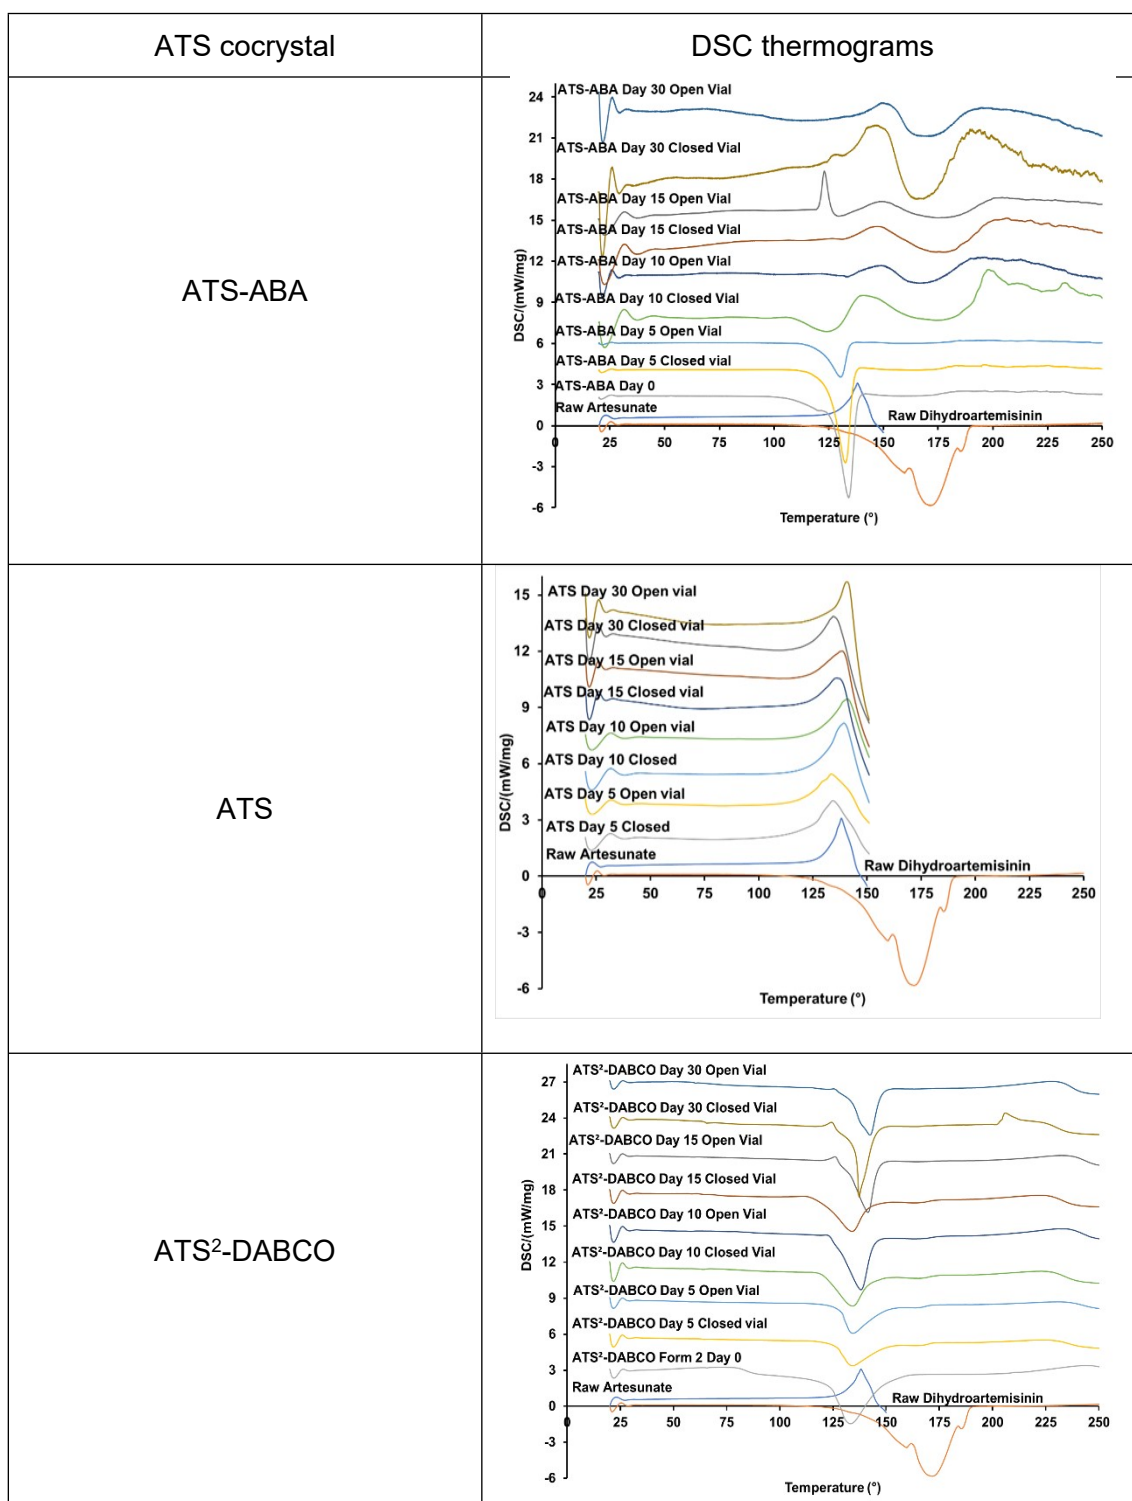

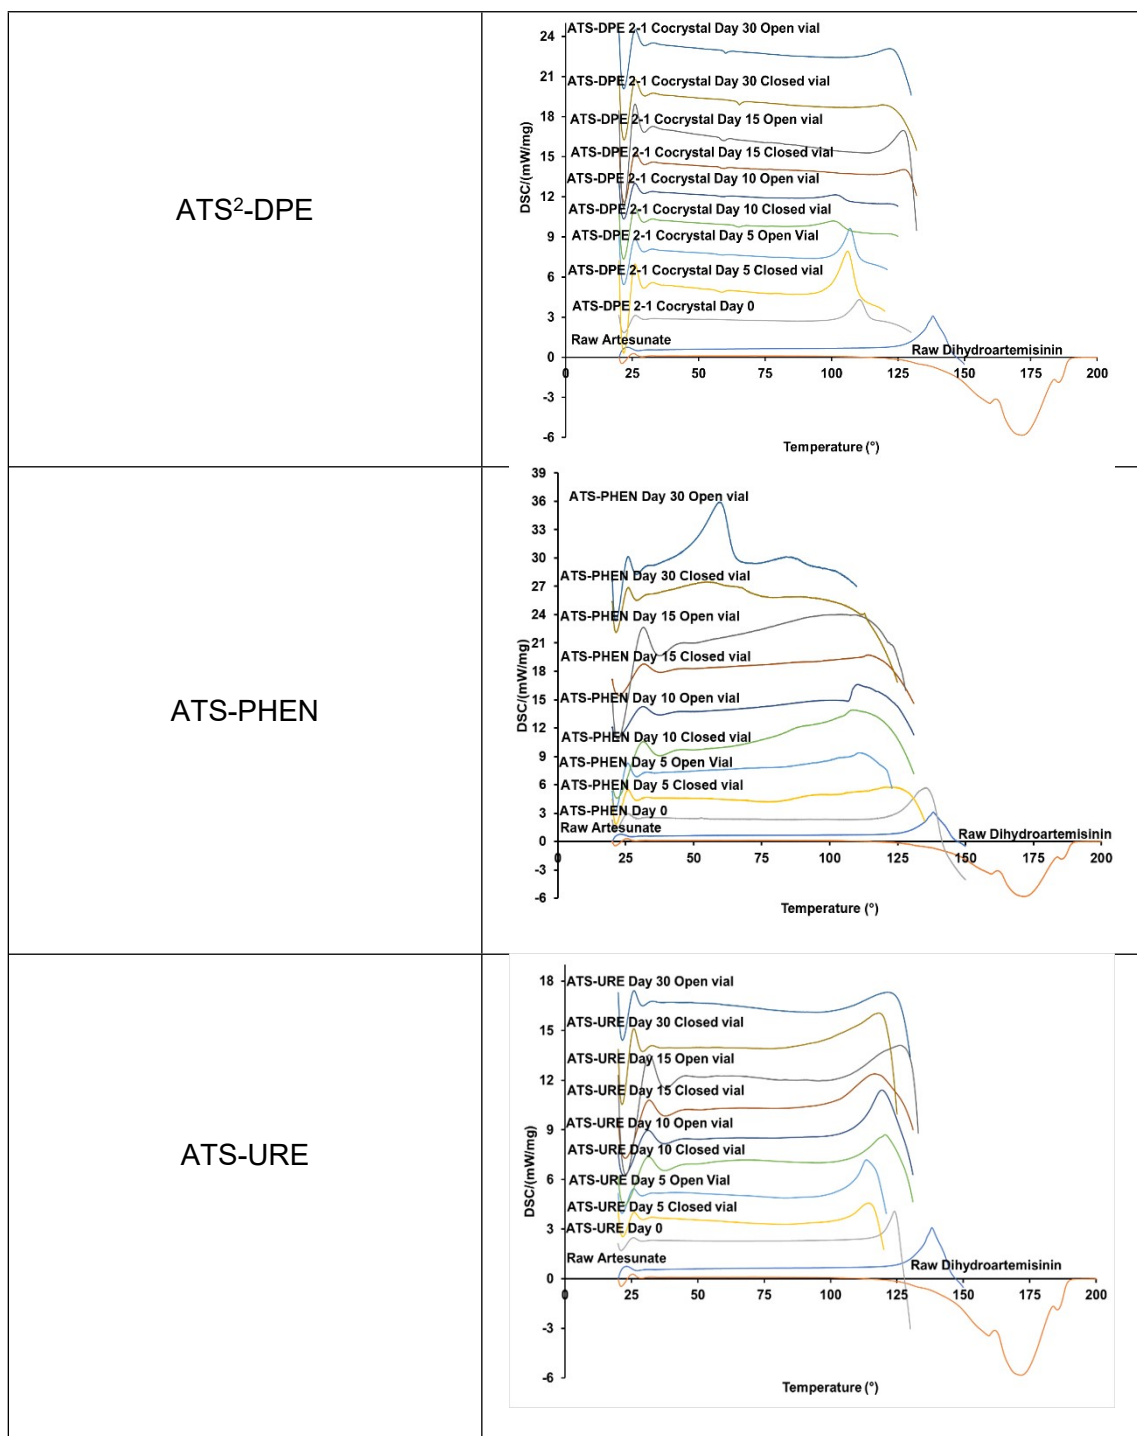



Table S13: Raw ATS and ATS cocrystals/salts TGA measurements after stress testing

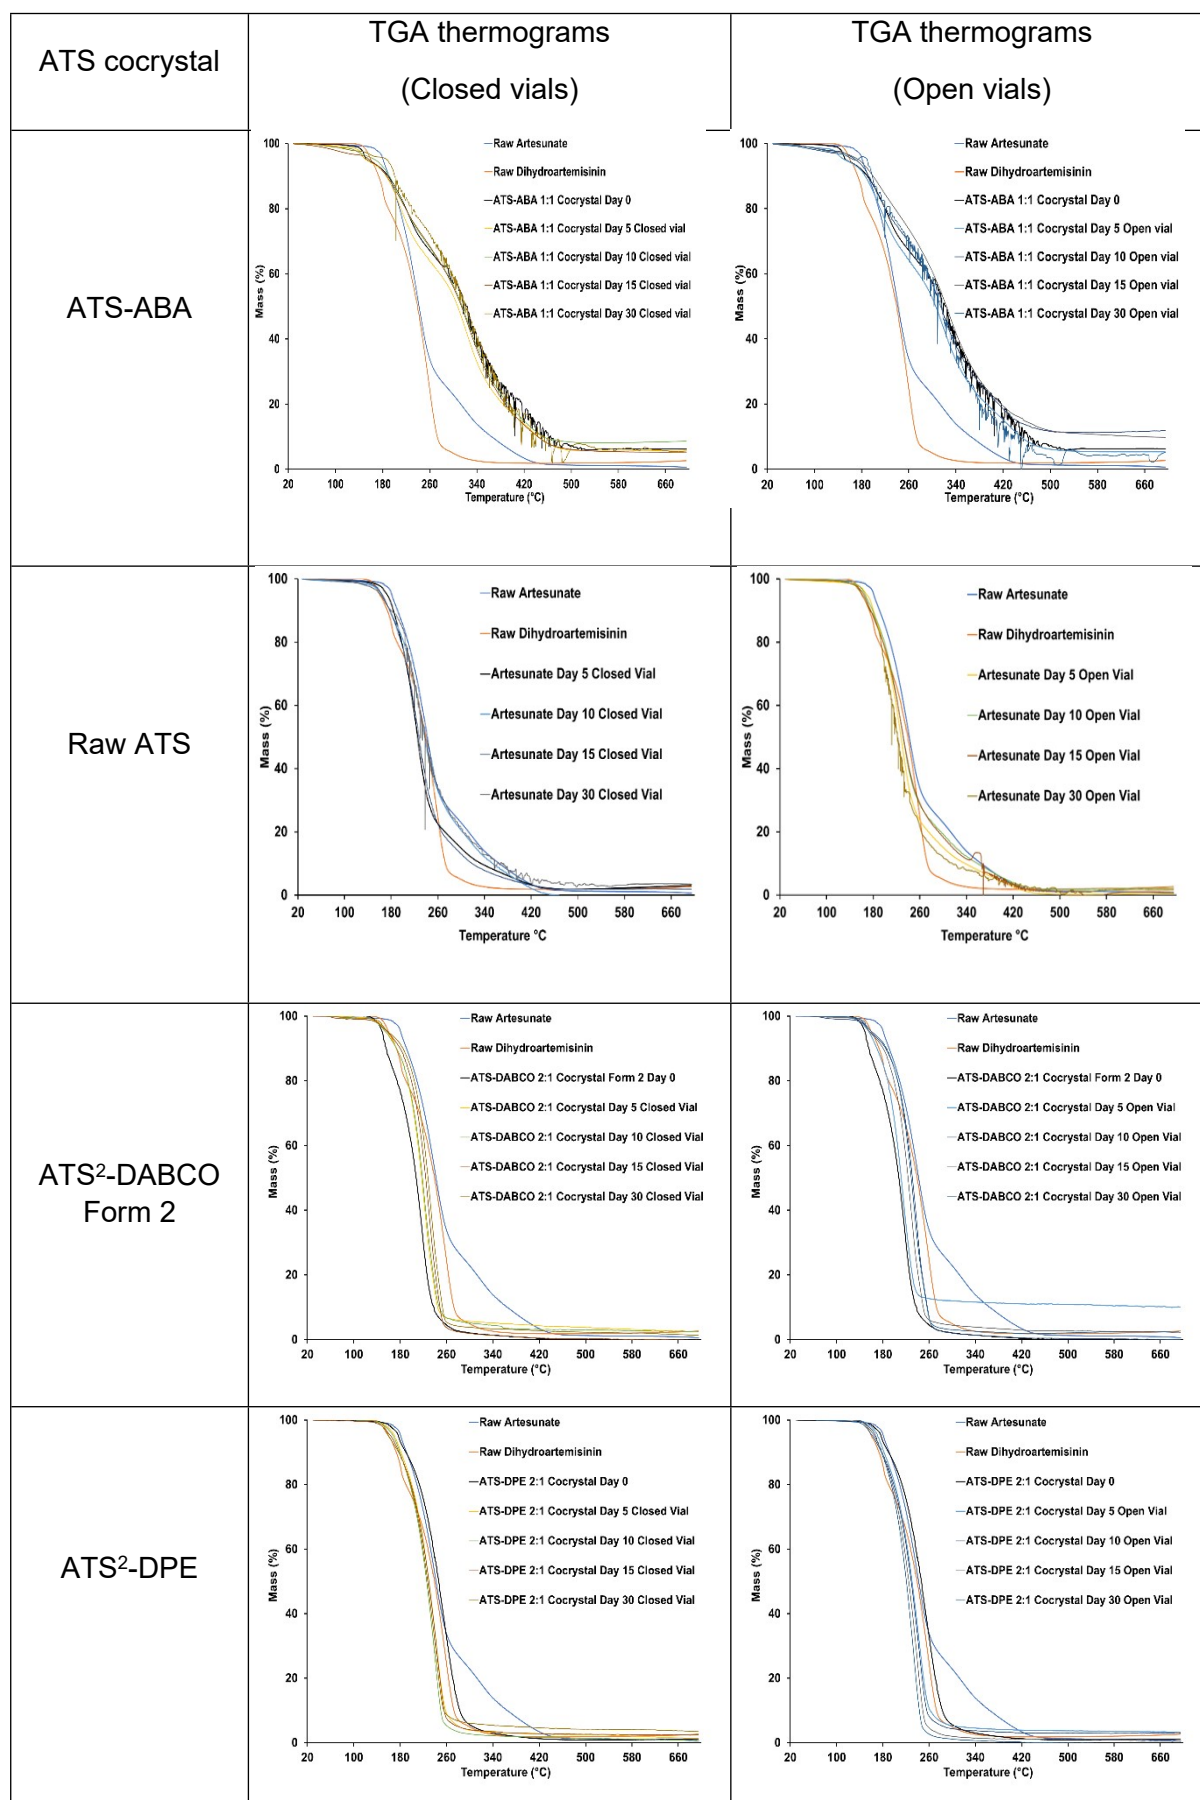

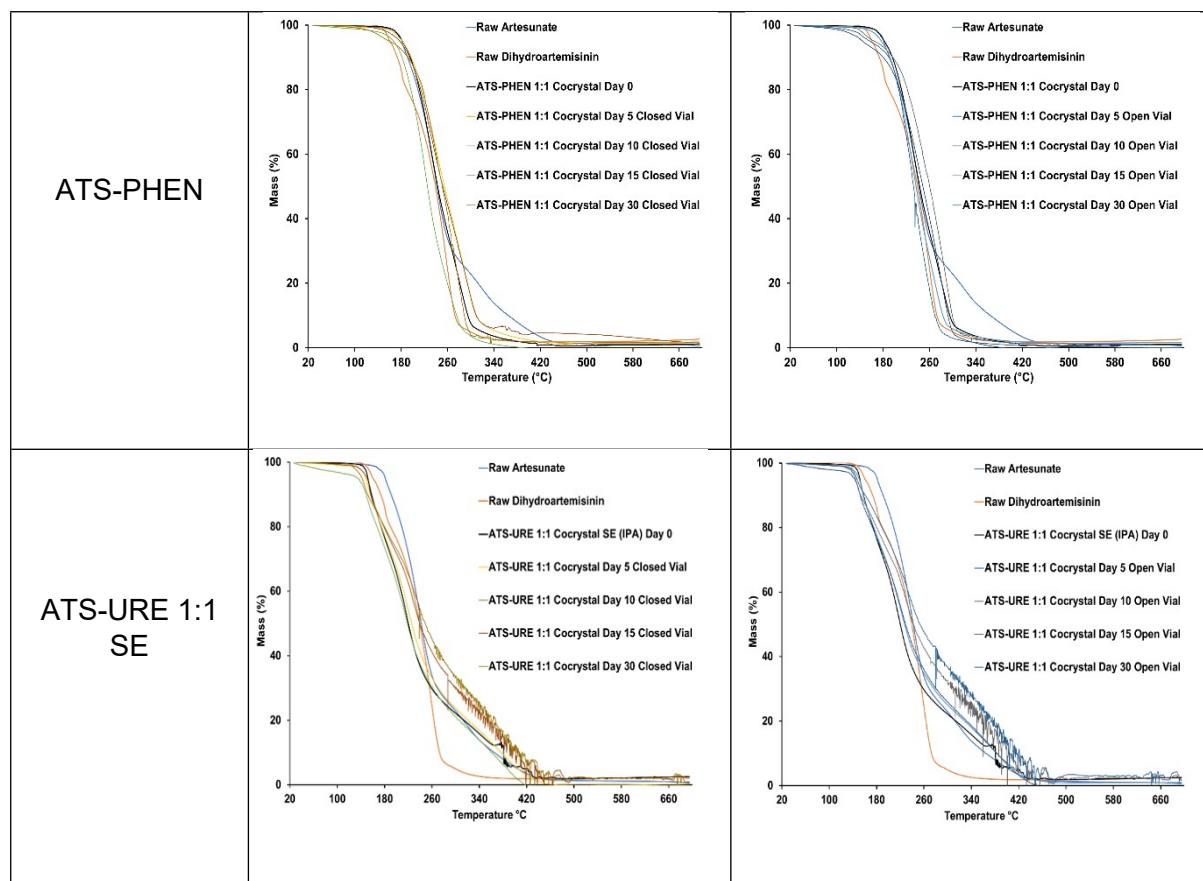

Figure S1: Comparison of (a) DSC and (b) TGA profiles of ATS, DHA, and solids recrystallised from NTM.

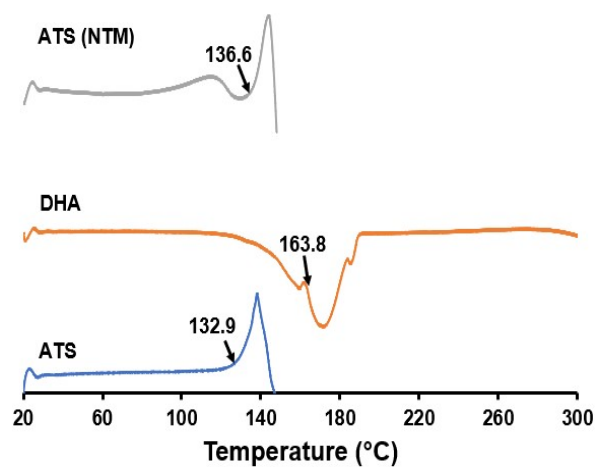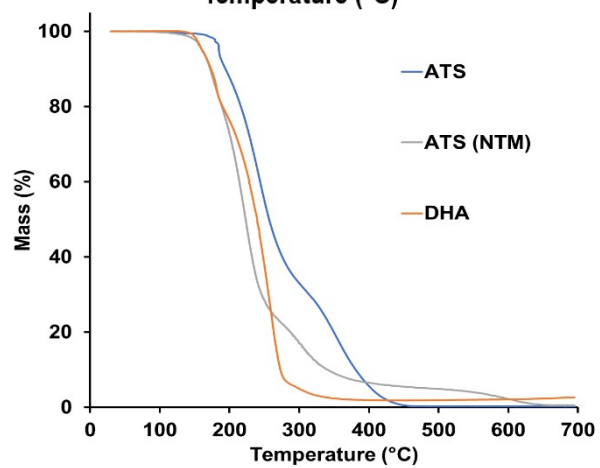

(a)

(b)

Figure S2: comparison of FTIR results: (a) raw and recrystallised ATS; (b) solids from NTM with raw ATS and DHA

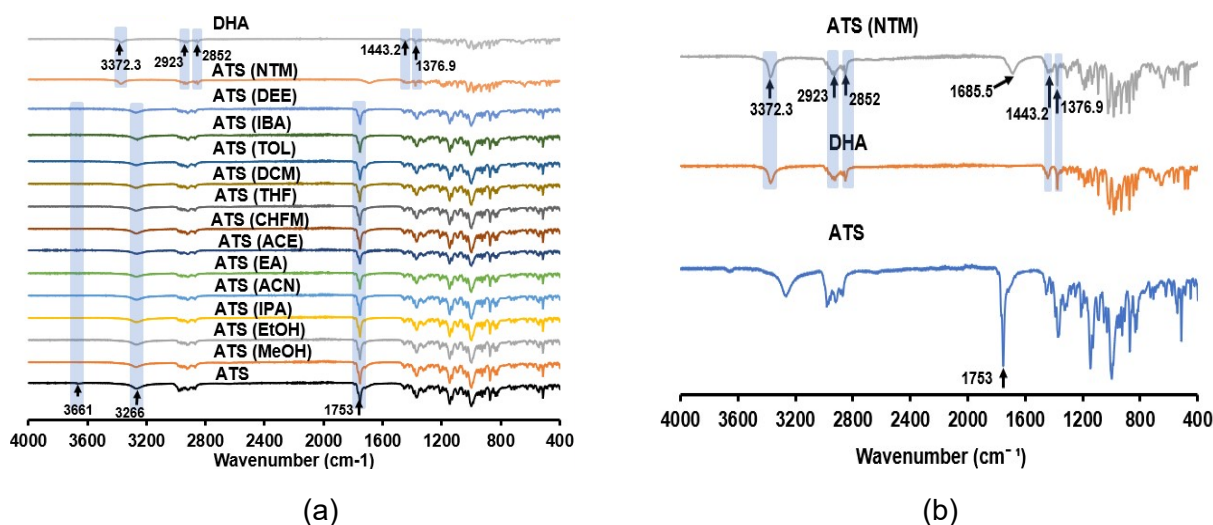

The FTIR results are consistent with the findings from the PXRD spectra. In all the recrystallized ATS samples, no new polymorphic forms were observed; instead, they retained the crystal packing structure of ATS. This is evidenced by the distinct OH stretching band around 3266 cm<sup>-1</sup>, the carbonyl group at 1753 cm<sup>-1</sup>, and the OH stretching vibration in the carboxylic acid observed at 3661 cm<sup>-1</sup> in concordance with the literature data [4].

Solids recrystallized in NTM exhibited both characteristic bands of DHA and ATS [4, 5]. Transformation to DHA is confirmed by the distinct infrared (IR) absorption bands at 3372.3 cm<sup>-1</sup> corresponding to the stretching vibration of the O-H group. The presence of symmetric and asymmetric C-H bond vibrations, observed as peaks at 2923 cm<sup>-1</sup> and 2852 cm<sup>-1</sup>, respectively, indicates the presence of DHA's methylene (CH<sub>2</sub>) and methyl (CH<sub>3</sub>) groups. Furthermore, the appearance of a band at 1443.2 cm<sup>-1</sup> signifies the bending vibration of the C-H bonds within the -CH<sub>2</sub>- groups. In comparison, the band at 1376.9 cm<sup>-1</sup> suggests symmetric bending vibrations of the C-H bonds in the lateral methyl groups. The OH stretching band 3266 cm<sup>-1</sup> in ATS may have been lost, while the carbonyl group at 1753 cm<sup>-1</sup> appears to have shifted to 1685.5 cm<sup>-1</sup>.

Figure S3: Degradation profiles of ATS and its multicomponent salts/cocrystals; a) ATS remaining in 20 % MeOH; b) DHA formed in 20 % MeOH; c) ATS remaining in 10 % MeOH; d) DHA formed in 10 % MeOH

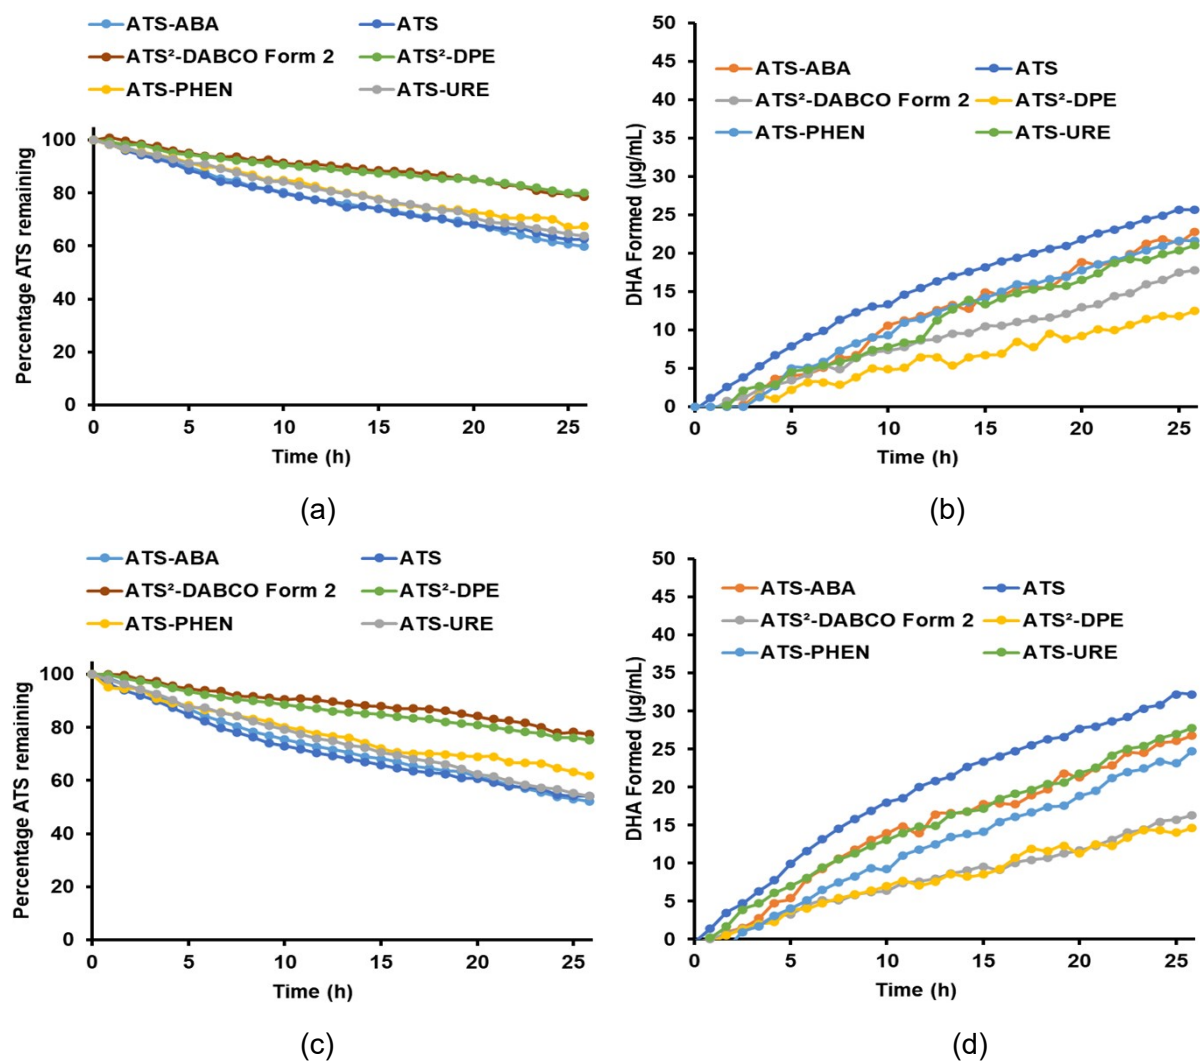

Figure S4: Concentration of DHA formed over time in (a) closed vials; (b) open vials

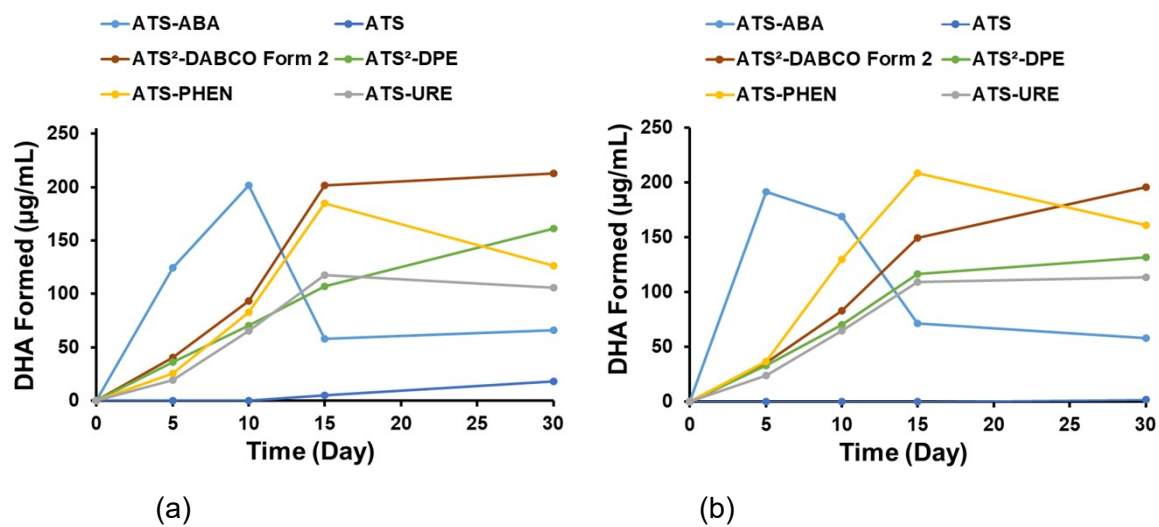

Figure S5: Comparison of raw ATS and ATS cocrystals/salts' particle size distribution

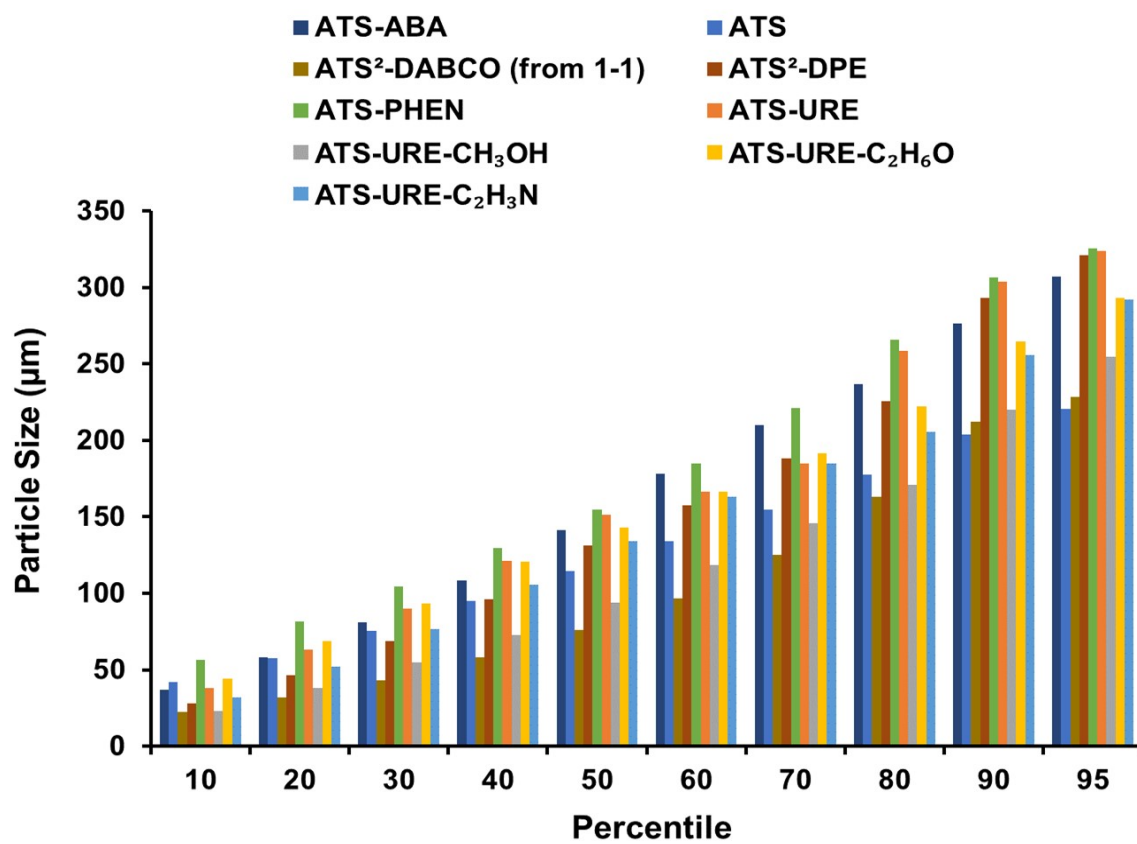



Figure S6: Solid state property of ATS after dissolution and equilibrium solubility assessment in DDW: a) PXRD; b) DSC; c) TGA; d) FTIR

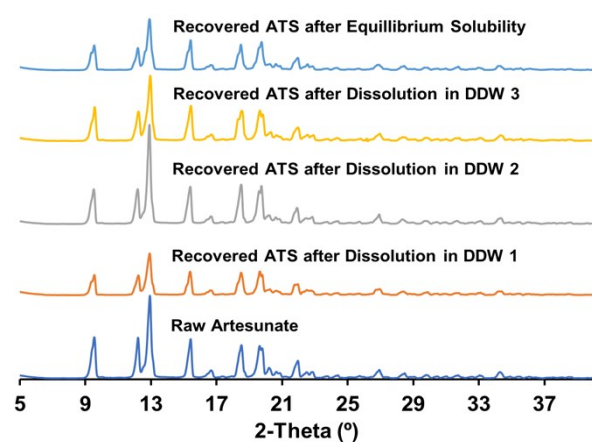

(a)

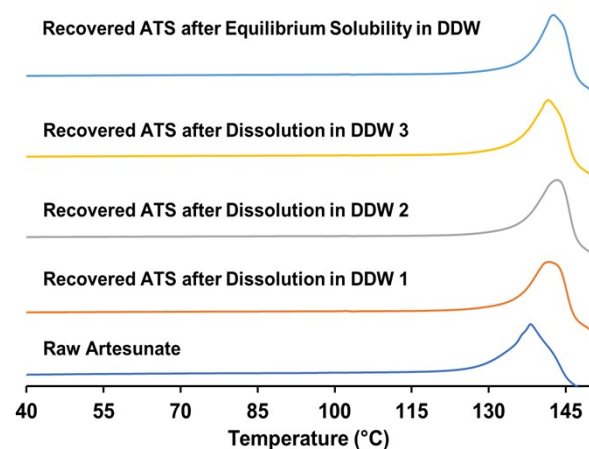

(b)

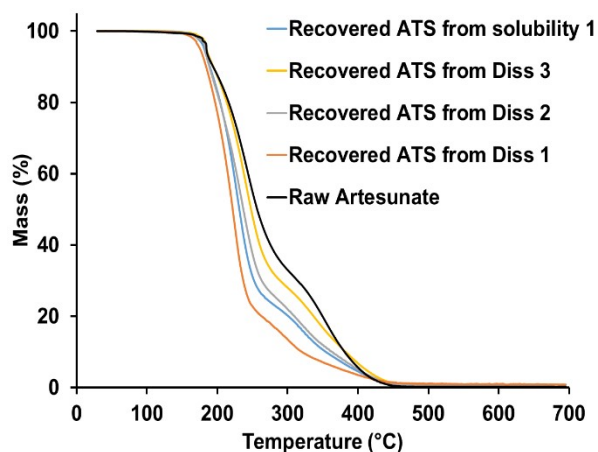

(c)

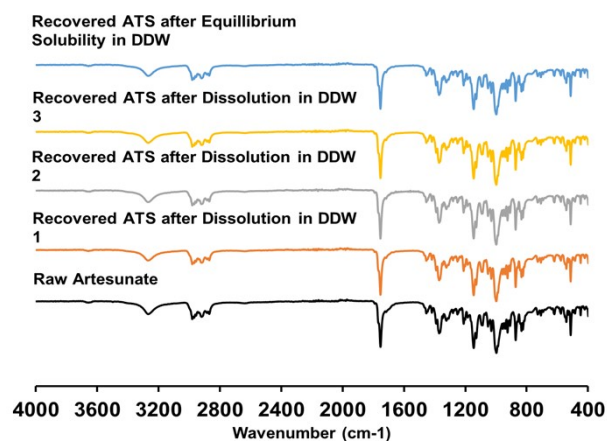

(d)

Figure S7: PXRD results of solid residues after ATS-URE dissolution tests

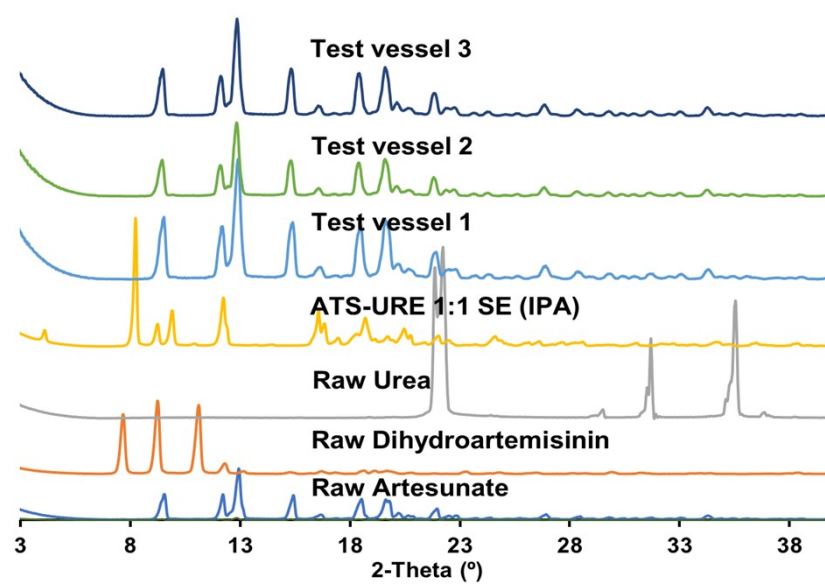

Figure S8:  
results of  
residues  
URE-  
dissolution

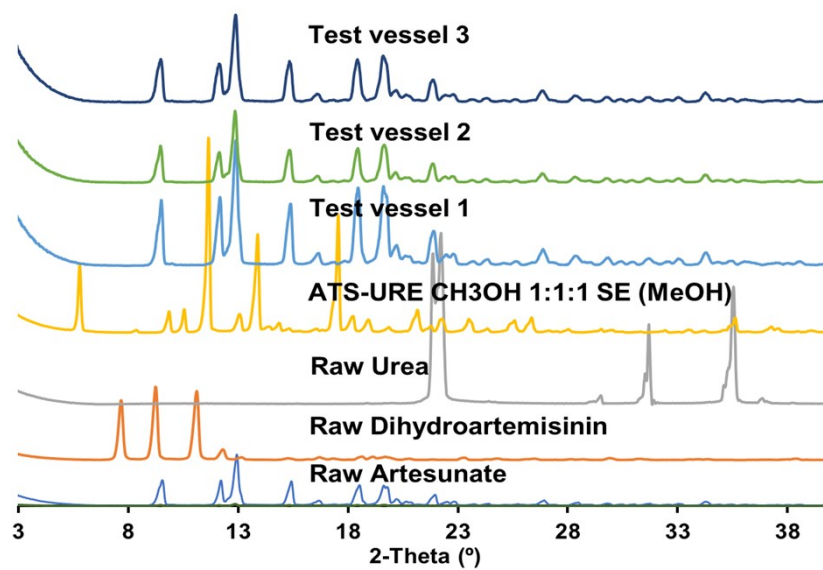

PXRD  
solid  
after ATS-  
CH<sub>3</sub>OH  
tests

Figure S9: PXRD results of solid residues after ATS-URE- $\text{C}_2\text{H}_6\text{O}$  dissolution tests

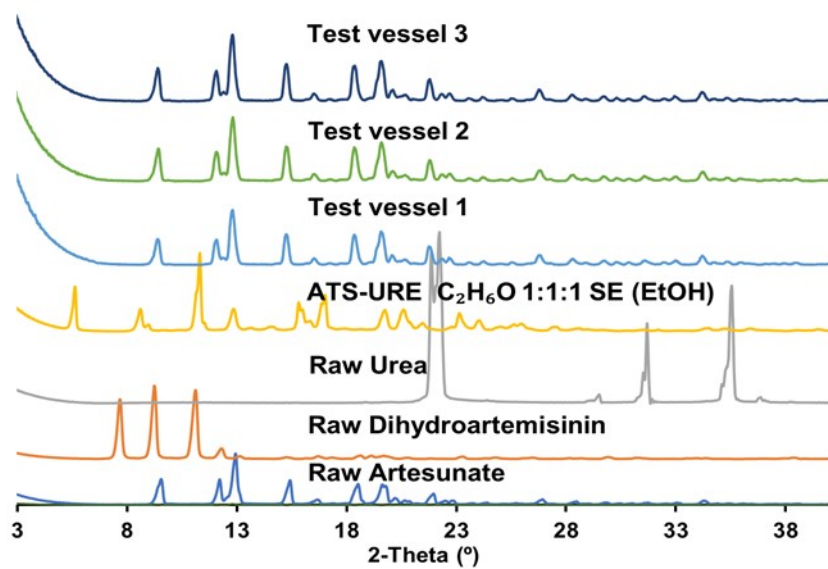

Figure S10: PXRD results of solid residues after ATS-URE  $\text{C}_2\text{H}_3\text{N}$  dissolution tests

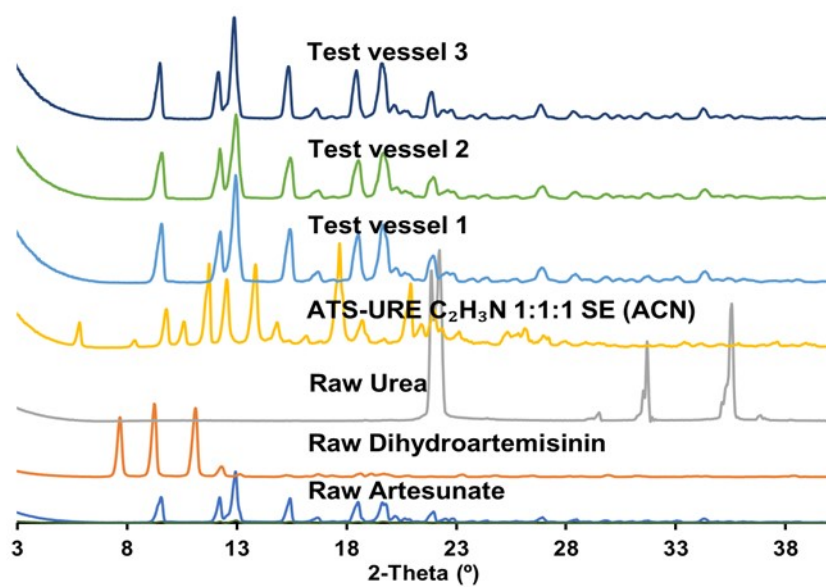

Figure S11: PXRD results of solid residues after ATS-PHEN dissolution tests

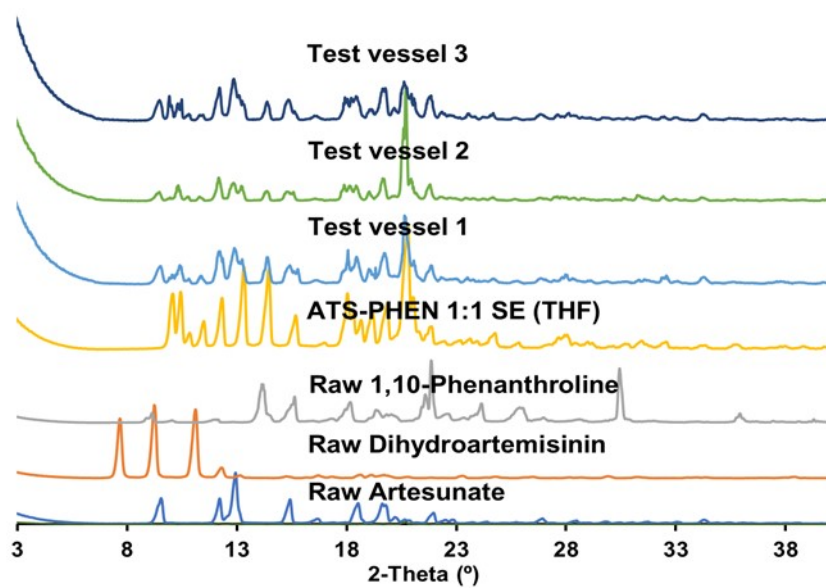

Figure S12: PXRD results of solid residues after ATS-ABA dissolution tests

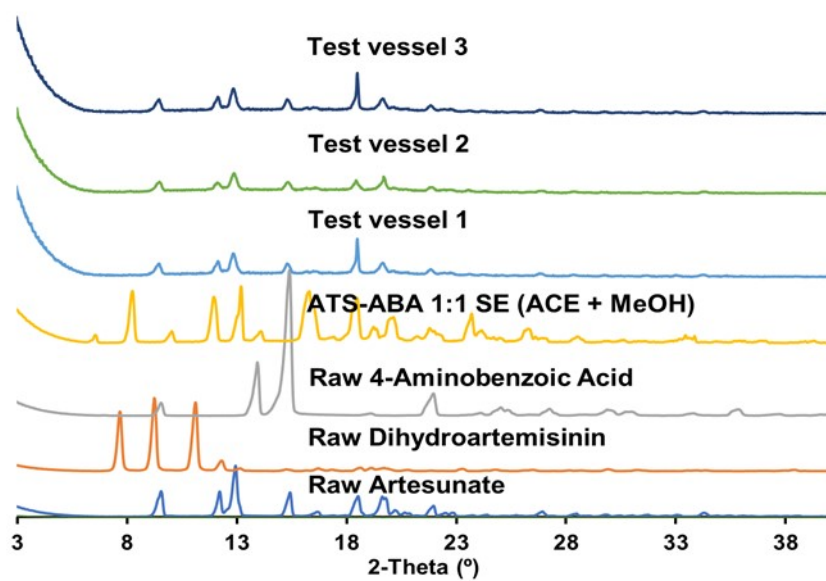



Figure S13: Reconstructed diffraction image of the  $0kl$  plane for ATS-URE, showing the marked diffuse streaks formed along the  $c^*$  direction. The data were indexed with orthorhombic unit cell parameters  $a = 5.3403(2)$  Å,  $b = 9.5836(3)$  Å,  $c = 42.6545(17)$  Å.

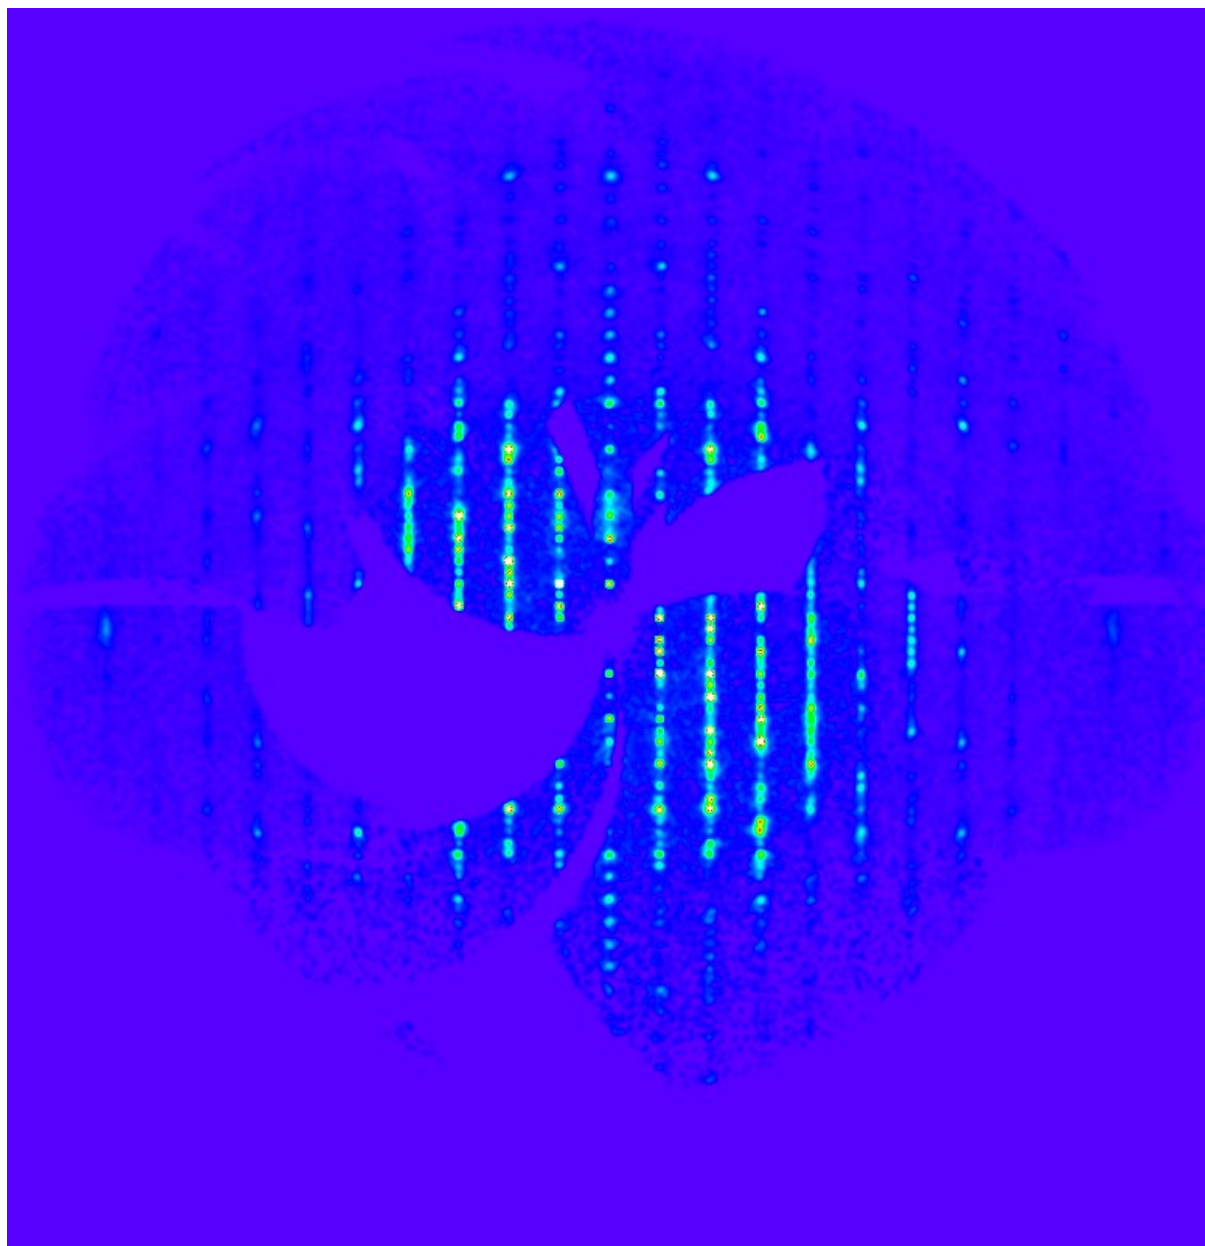

Figure S14: Difference Fourier map calculated for ATS<sup>2</sup>-DABCO form 2 at the 0.25 e/Å<sup>3</sup> level. The negative density around O2, C12 and O13 (red) indicates the possibility that a minor disorder component is present with the ring system broken up. The positive density peaks (green) did not reveal a clear structural model for the product.

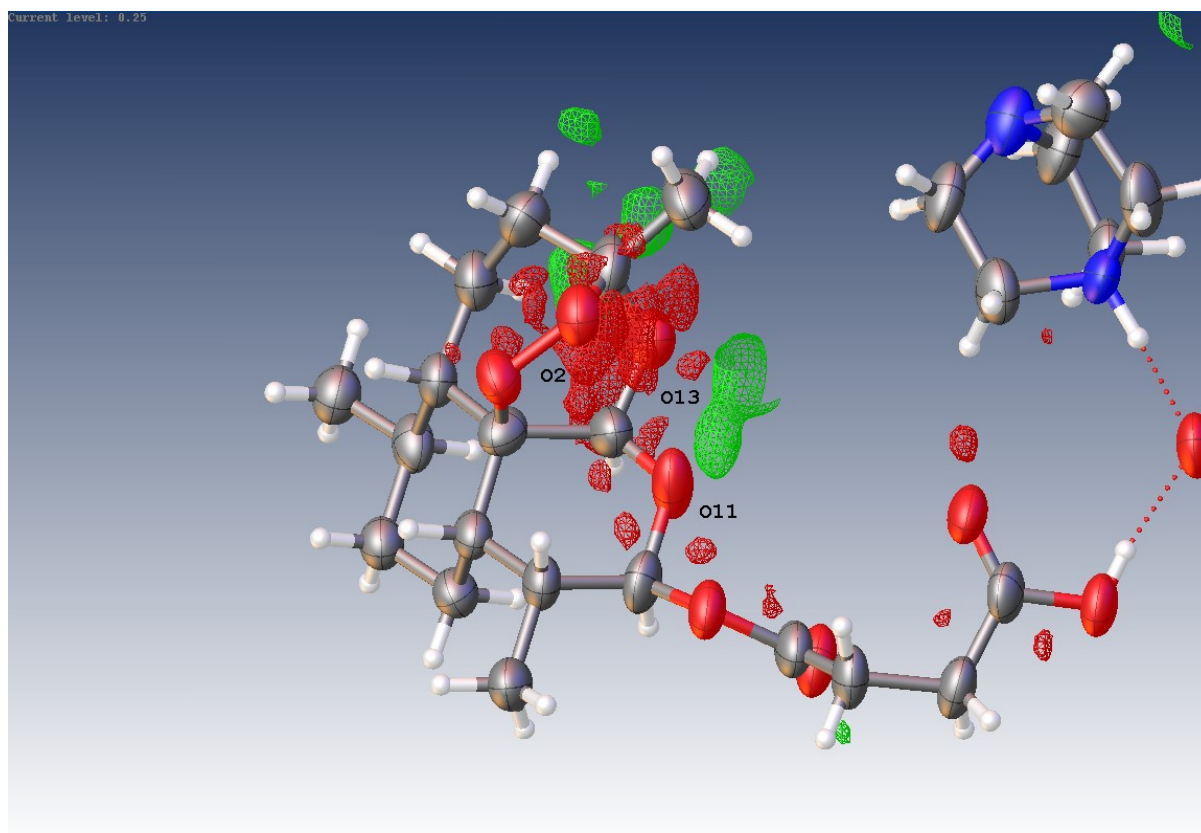

## References

1. Silverstein, R.M., G.C. Bassler, and T.C. Morrill, *Spectrometric identification of organic compounds* 1991, Singapore: John Wiley & Sons, Inc. 100-128.
2. Samie, A., G.R. Desiraju, and M. Banik, *Salts and Cocrystals of the Antidiabetic Drugs Gliclazide, Tolbutamide, and Glipizide: Solubility Enhancements through Drug–Coformer Interactions*. *Crystal Growth & Design*, 2017. **17**(5): p. 2406-2417.
3. Yang, S.-Y., et al., *Pharmaceutical cocrystals and salts of enrofloxacin: Structure and properties*. *Journal of Molecular Structure*, 2022. **1265**: p. 133335.
4. LUO, B., et al., *Synthesis, Characterization and Antibacterial Activities Study of a Pharmaceutical Cocrystal of Artesunate and 4,4'-Bipyridine*. *CHINESE JOURNAL OF STRUCTURAL CHEMISTRY*, 2020. **39**(9): p. 1633-1638.
5. Circioban, D., et al., *Thermal stability and kinetic degradation study for dihydroartemisinin*. *Journal of Thermal Analysis and Calorimetry*, 2020. **142**(5): p. 2131-2139.
